# Supplementary material for: Novel fast Li-ion conductors for solid-state electrolytes from first-principles
Source: Royal Society of Chemistry journal article supplement (doi:10.1039/d5ee07336g), 2026-04-22
Supplement: d5ee07336g1.pdf [file d5ee07336g1.pdf]

## Supplementary information<sup>†</sup>

# Novel fast Li-ion conductors for solid-state electrolytes from first-principles

Tushar Singh Thakur,<sup>\*a</sup> Loris Ercole,<sup>a</sup> and Nicola Marzari<sup>a,b,c</sup>

The following sections exhaustively illustrate the MSD plots derived from FPMD simulations of all the structures discussed in the main text.

### S1 Fast Li-ion conductors

We discover 9 novel fast Li-ion conductors that exhibit significant diffusion at low temperatures along with desirable activation energy. We show the MSD plots at 1000 K, 750 K, 600 K and 500 K.

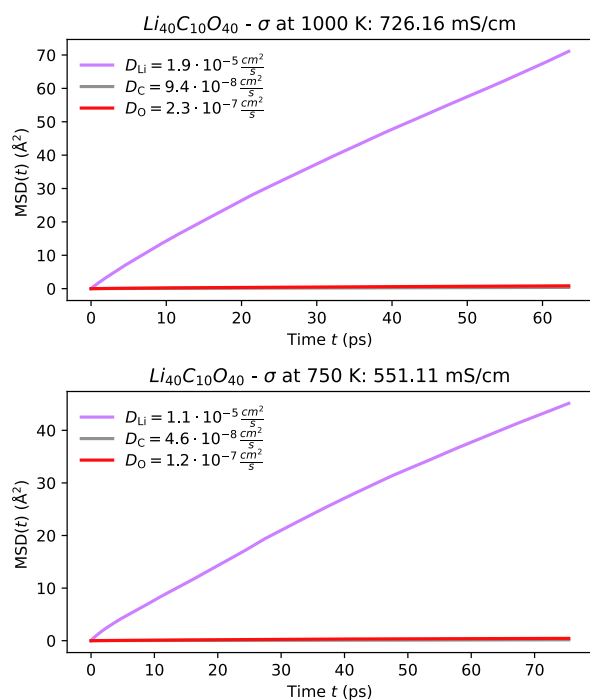

Fig. S1 MSD(t) plot of Li along with host-lattice species of  $Li_4CO_4$  at all temperatures studied with FPMD.

We show the iso-surface plots at 600 K for the oxides and nitride.

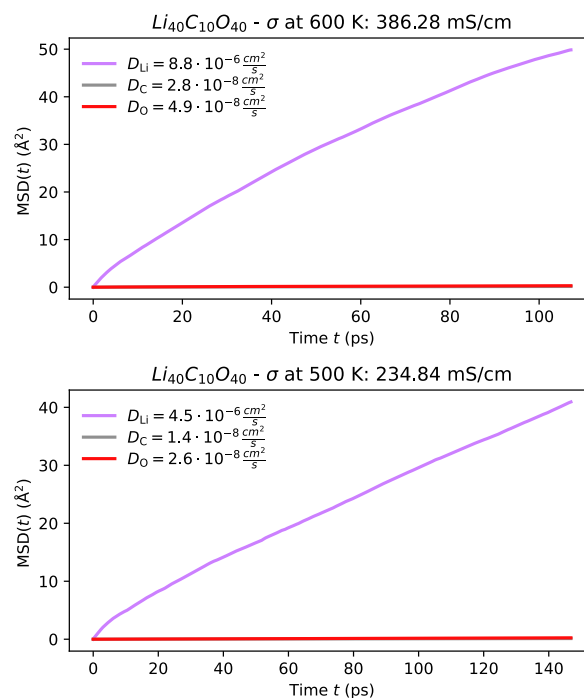

Fig. S2 MSD(t) plot of Li along with host-lattice species of  $Li_4CO_4$  at all temperatures studied with FPMD.

<sup>\*</sup> E-mail: tushar.thakur@epfl.ch

<sup>a</sup> Theory and Simulation of Materials (THEOS), and National Centre for Computational Design and Discovery of Novel Materials (MARVEL), École Polytechnique Fédérale de Lausanne, CH-1015 Lausanne, Switzerland

<sup>b</sup> PSI Center for Scientific Computing, Theory and Data, Paul Scherrer Institute, 5232 Villigen PSI, Switzerland

<sup>c</sup> Theory of Condensed Matter, Cavendish Laboratory, University of Cambridge, Cambridge CB3 0US, United Kingdom

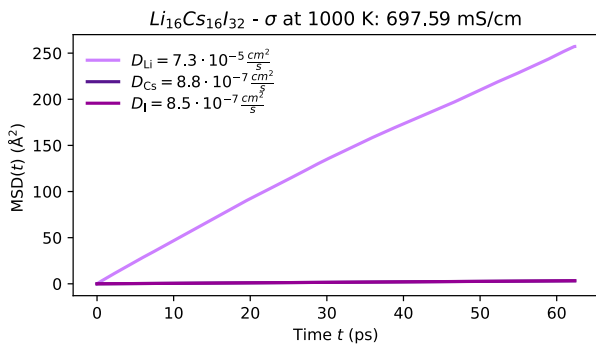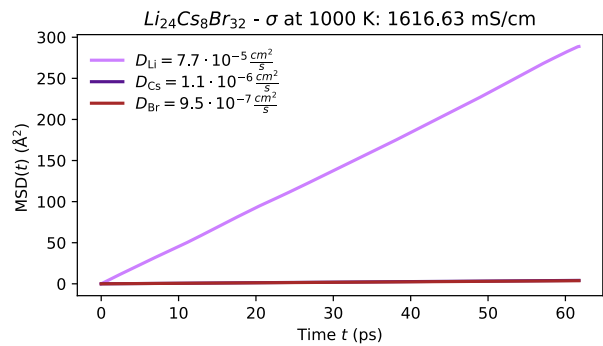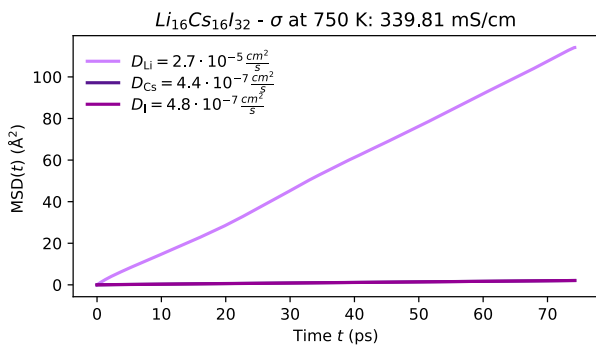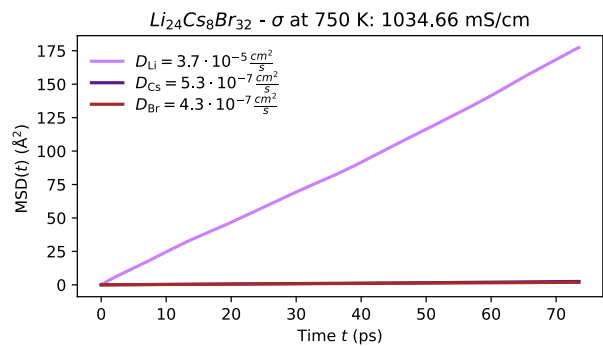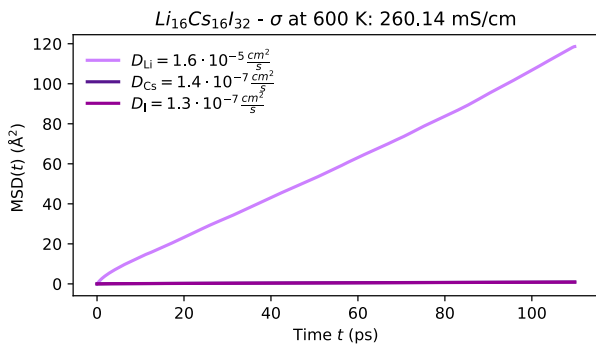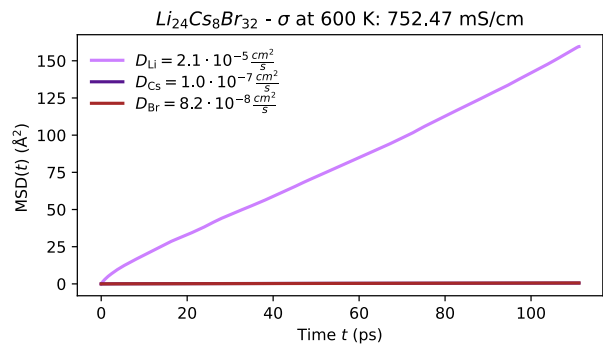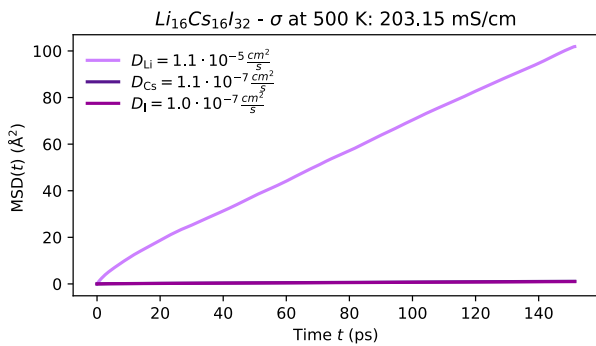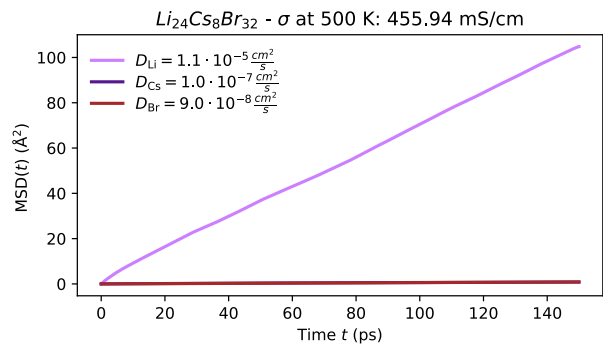

Fig. S3 MSD(t) plot of Li along with host-lattice species of *LiCsI<sub>2</sub>* at all temperatures studied with FPMD.

Fig. S4 MSD(t) plot of Li along with host-lattice species of *Li<sub>3</sub>CsBr<sub>4</sub>* at all temperatures studied with FPMD.

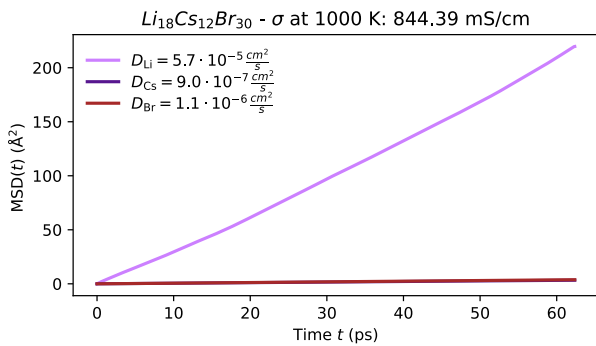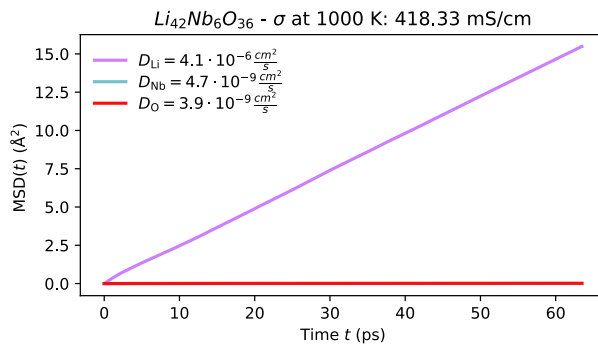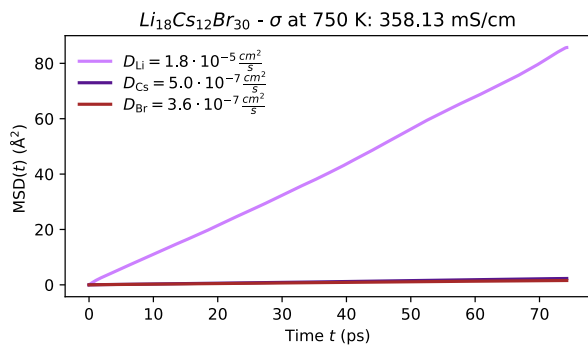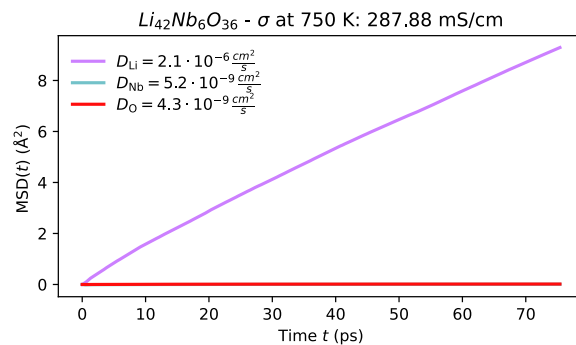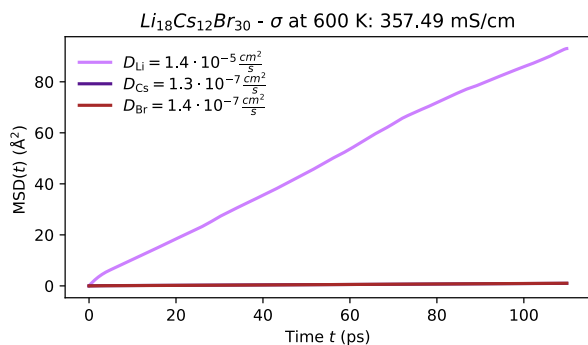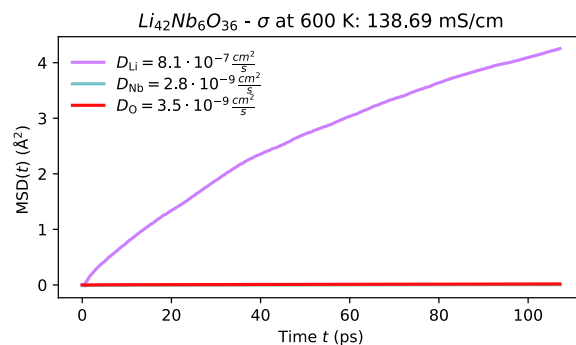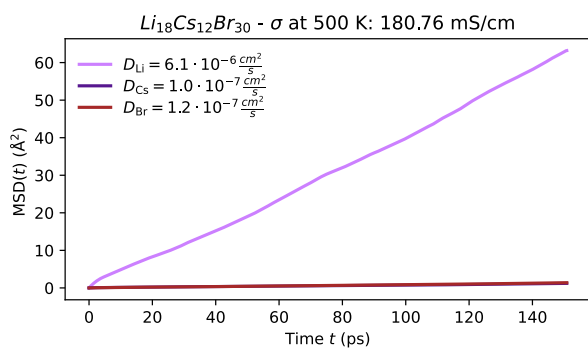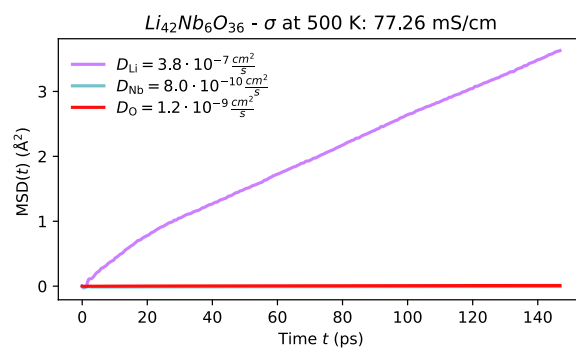

Fig. S5 MSD(t) plot of Li along with host-lattice species of *Li<sub>18</sub>Cs<sub>12</sub>Br<sub>30</sub>* at all temperatures studied with FPMD.

Fig. S6 MSD plot of Li along with host-lattice species of *Li<sub>42</sub>Nb<sub>6</sub>O<sub>36</sub>* at all temperatures studied with FPMD

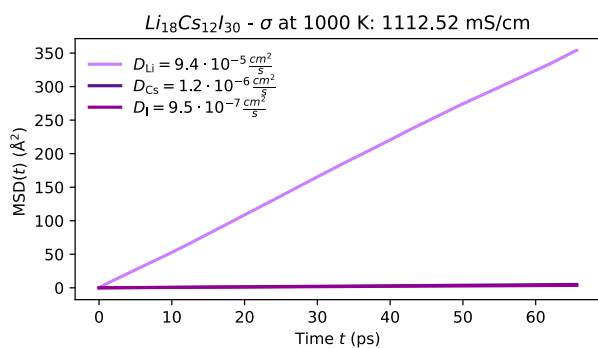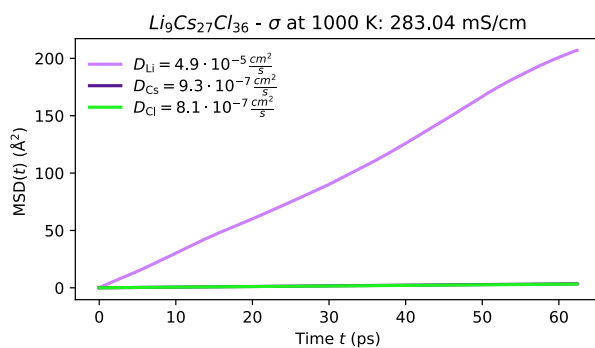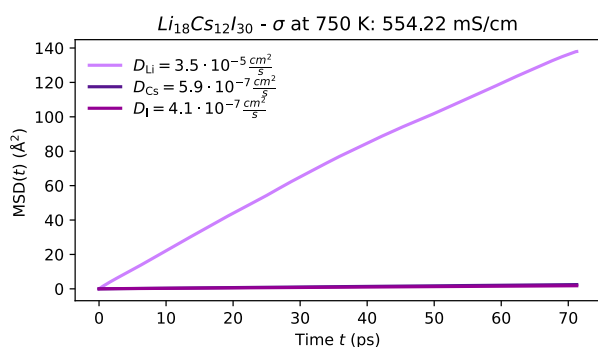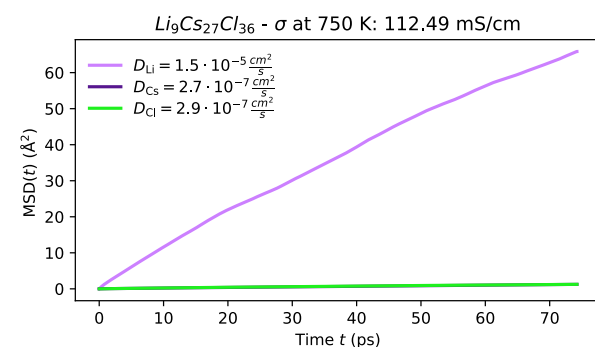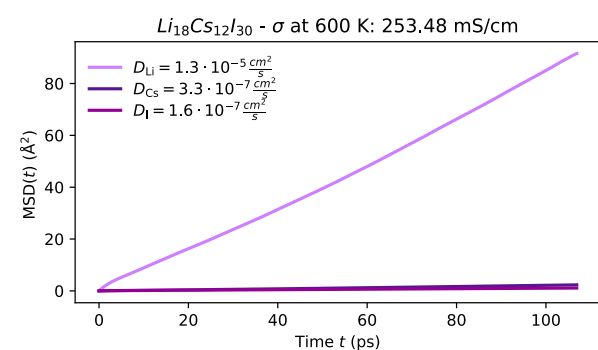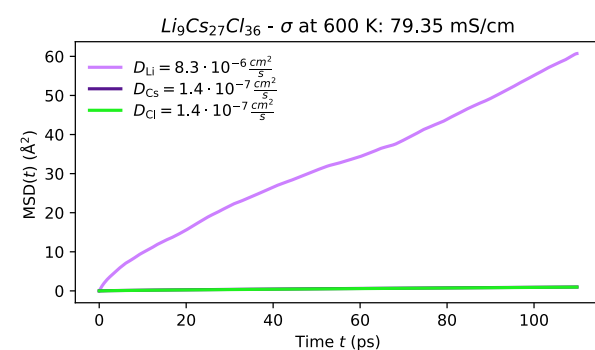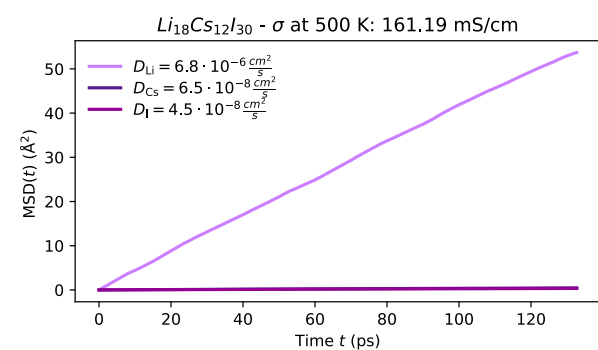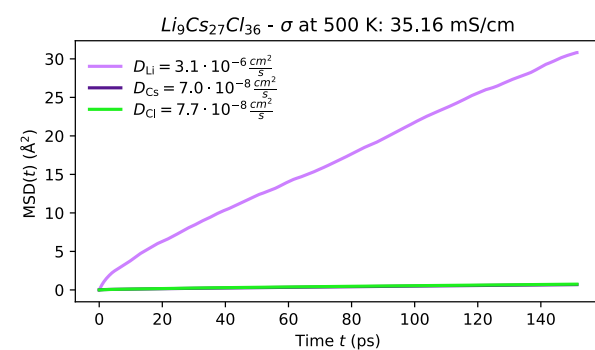

Fig. S7 MSD plot of Li along with host-lattice species of *Li<sub>3</sub>CS<sub>2</sub>I<sub>5</sub>* at all temperatures studied with FPMD

Fig. S8 MSD plot of Li along with host-lattice species of *LiCS<sub>3</sub>Cl<sub>4</sub>* at all temperatures studied with FPMD

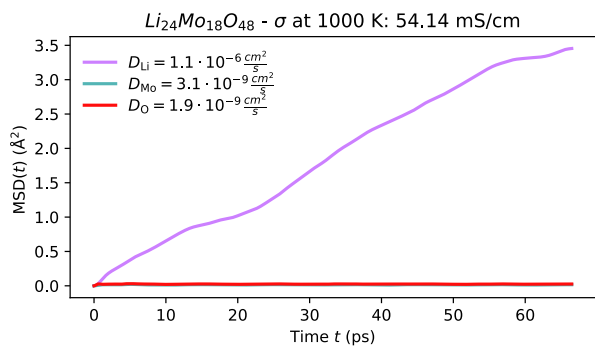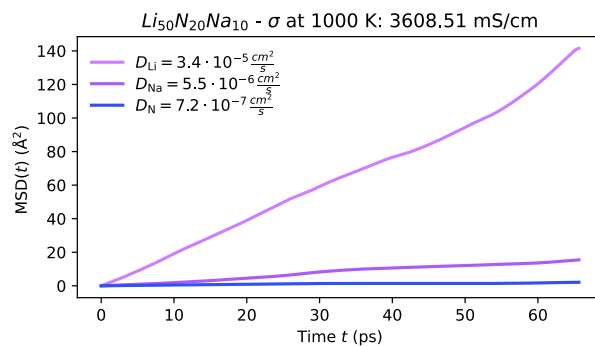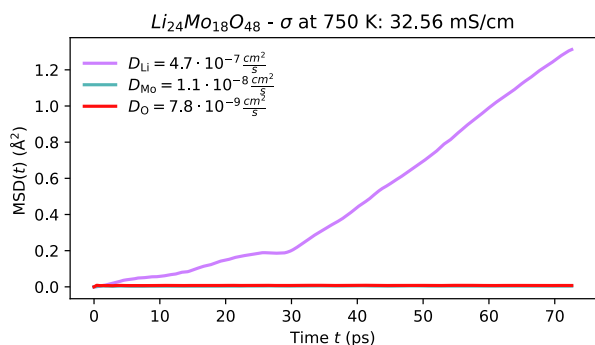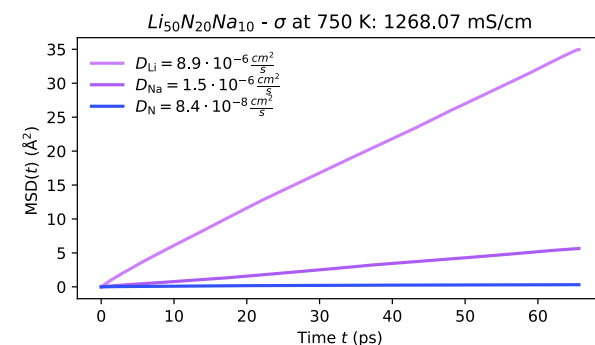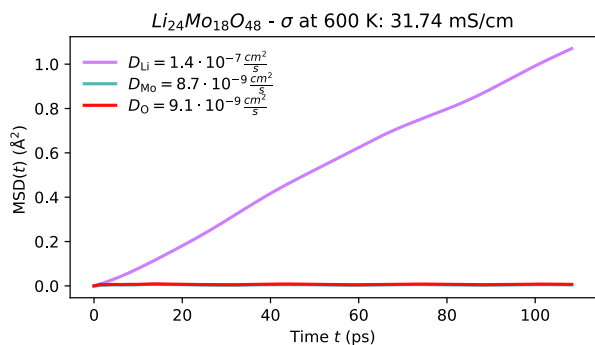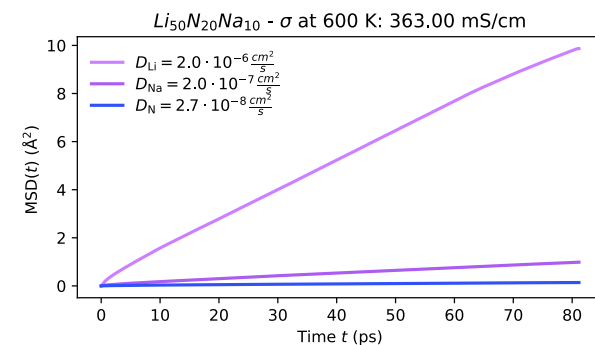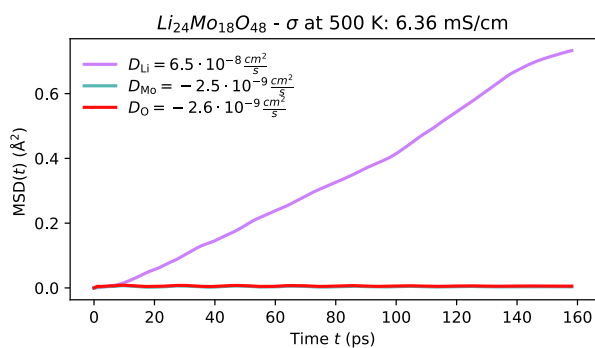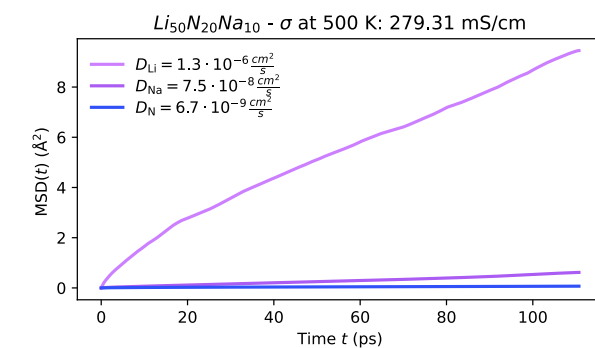

Fig. S9 MSD plot of Li along with host-lattice species of *Li<sub>4</sub>Mo<sub>3</sub>O<sub>8</sub>* at all temperatures studied with FPMD

Fig. S10 MSD plot of Li along with host-lattice species of *Li<sub>5</sub>NaN<sub>2</sub>* at all temperatures studied with FPMD

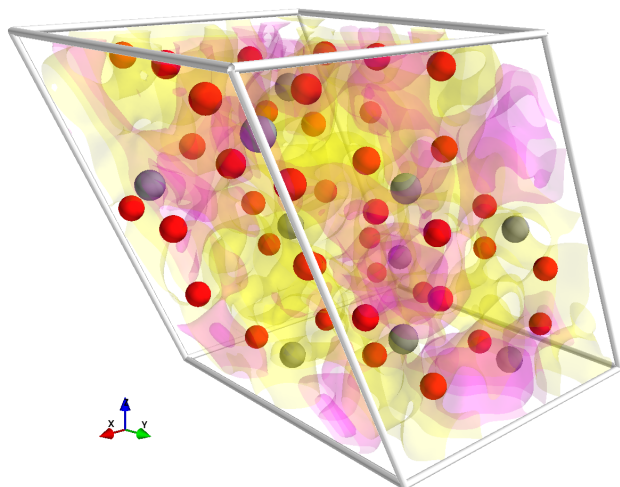

Fig. S11 Li-ion density of  $Li_4CO_4$  at 600 K from FPMD. The pink and yellow channels clearly illustrate Li-ion diffusion in this material, establishing this materials as a 3-dimensional Li-ion conductor even at lower temperatures.

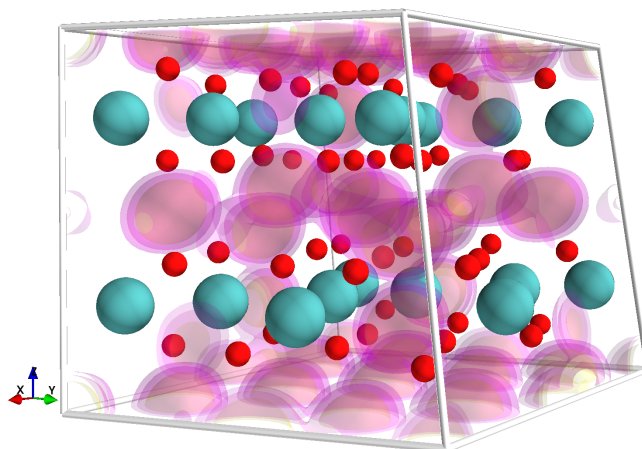

Fig. S13 Li-ion density of  $Li_4M_{03}O_8$  at 600 K from FPMD. The pink clouds illustrate Li-ion diffusion in this material in a layered fashion, establishing this materials as a 3-dimensional Li-ion conductor even at lower temperatures.

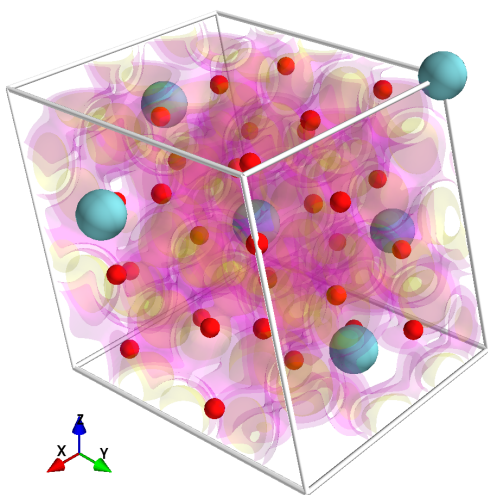

Fig. S12 Li-ion density of  $Li_7NbO_6$  at 600 K from FPMD. The pink and yellow clouds depict Li-ion diffusion in a dispersed manner, establishing this materials as a robust 3-dimensional ionic conductor at lower temperatures.

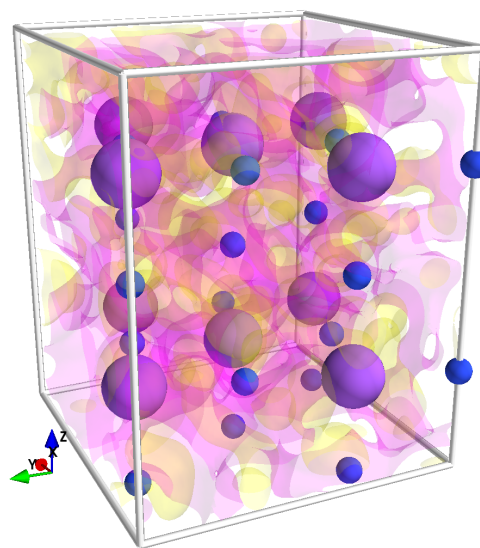

Fig. S14 Li-ion density of  $Li_5NaN_2$  at 600 K from FPMD. The pink and yellow clouds illustrate Li-ion diffusion in a dispersed fashion, establishing this materials as a promising 3-dimensional ionic conductor at lower temperatures.

## S2 Potential fast Li-ion conductors

We identify 25 structures that exhibit significant diffusion at 1000 K in our FPMD simulations, but do not display the same behaviour at lower temperatures. We show the MSD plots at 1000 K, 750 K, 600 K and 500 K.

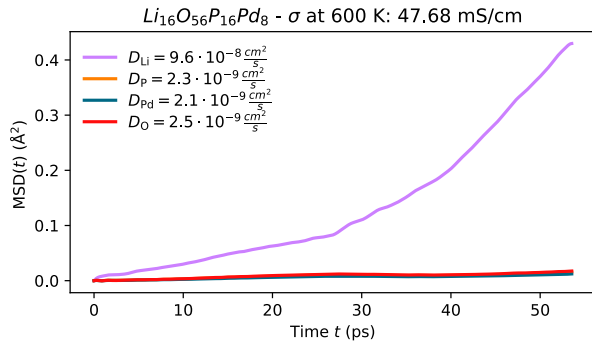

Fig. S15 MSD plot of Li along with host-lattice species of *Li<sub>2</sub>P<sub>2</sub>PdO<sub>7</sub>* at 600 K. This structure was too expensive to simulate with full-first principles so we studied it at only 600 K with FPMD.

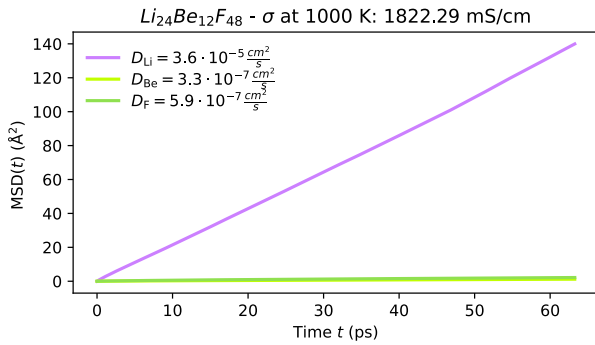

Fig. S16 MSD(t) plot of Li along with host-lattice species of *Li<sub>2</sub>BeF<sub>4</sub>* at 1000 K, studied with FPMD.

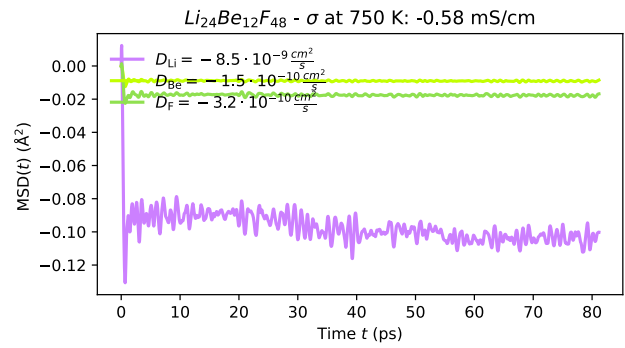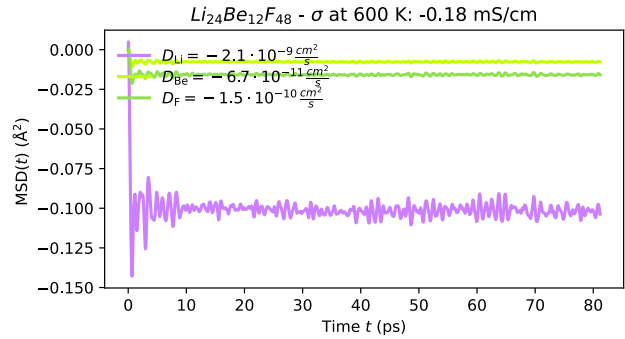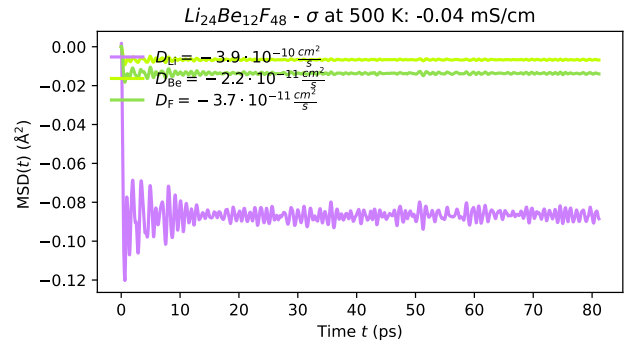

Fig. S17 MSD plot of Li along with host-lattice species of *Li<sub>2</sub>BeF<sub>4</sub>* at 750 K, 600 K, and 500 K, studied with FPMD

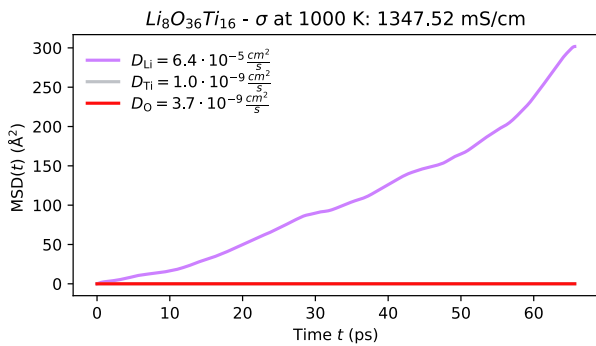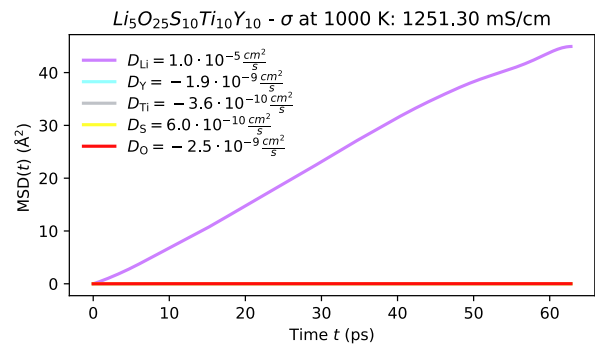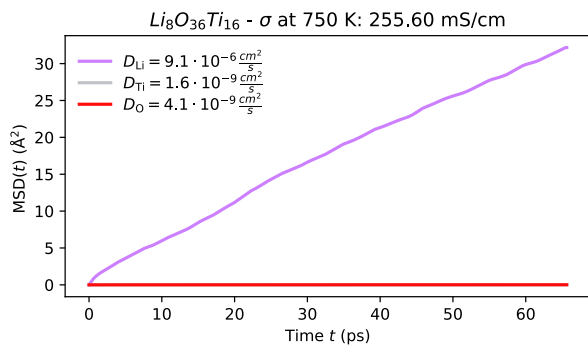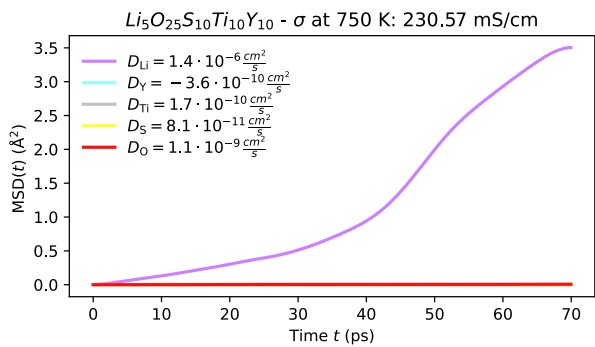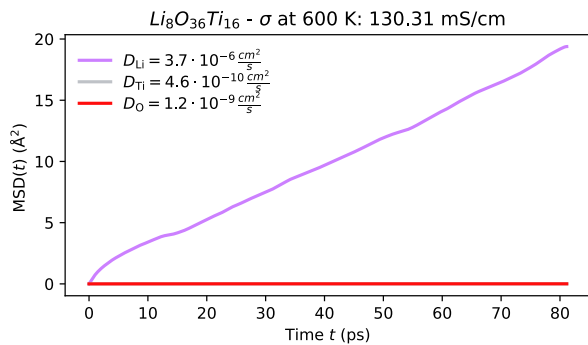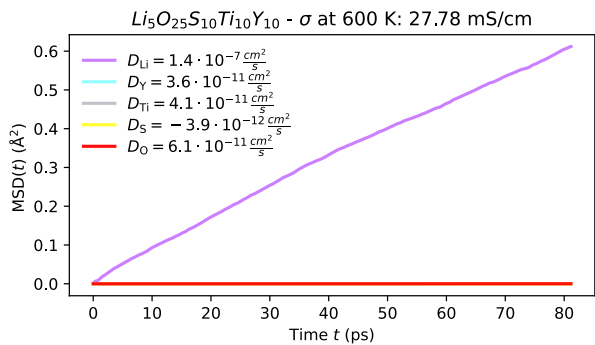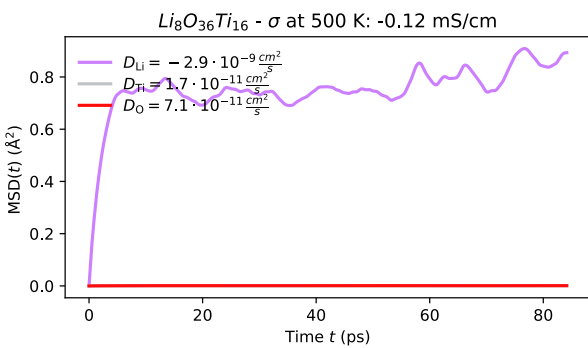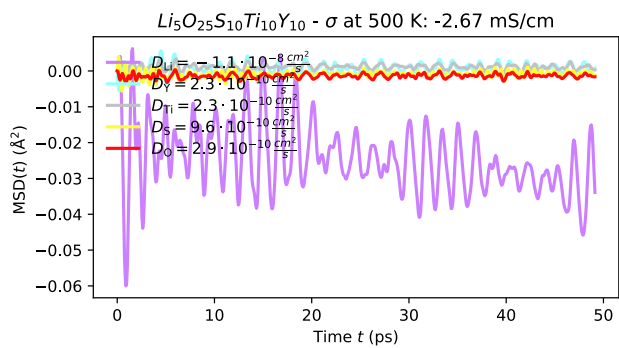

Fig. S18 MSD plot of Li along with host-lattice species of  $\text{Li}_2\text{Ti}_4\text{O}_9$  at all temperatures studied with FPMD

Fig. S19 MSD plot of Li along with host-lattice species of  $\text{LiY}_2\text{Ti}_2\text{S}_2\text{O}_5$  at all temperatures studied with FPMD

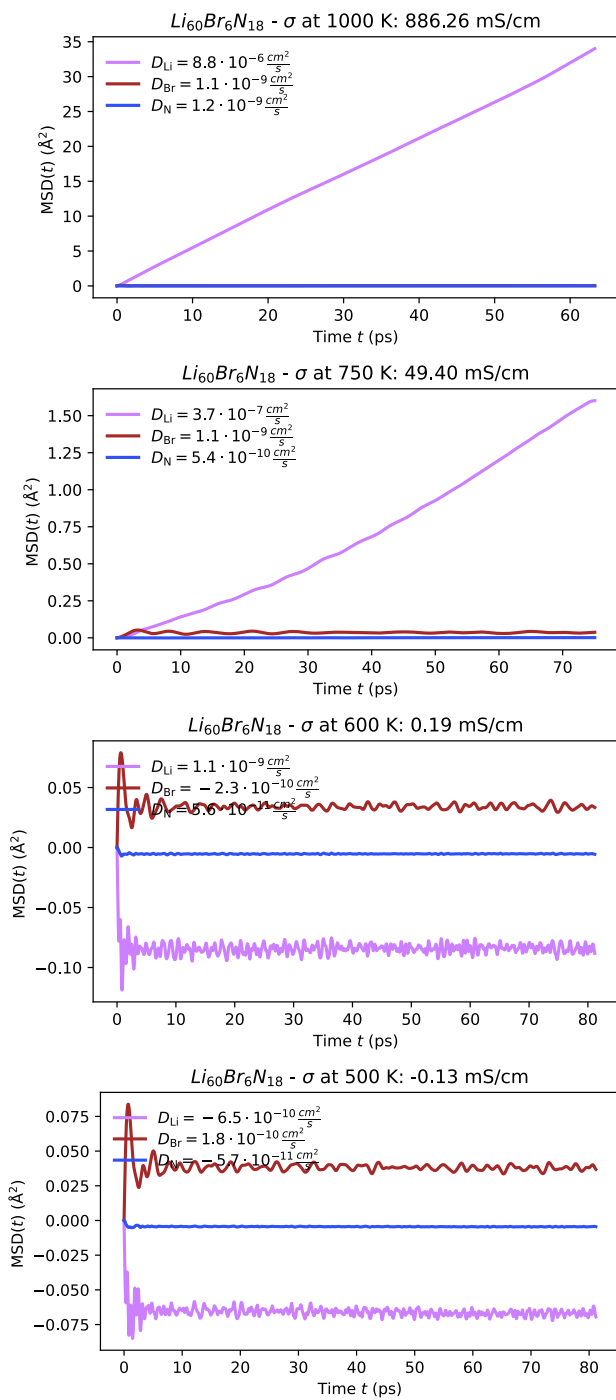

Fig. S20 MSD plot of Li along with host-lattice species of  $\text{Li}_1\text{OBrN}_3$  at all temperatures studied with FPMD

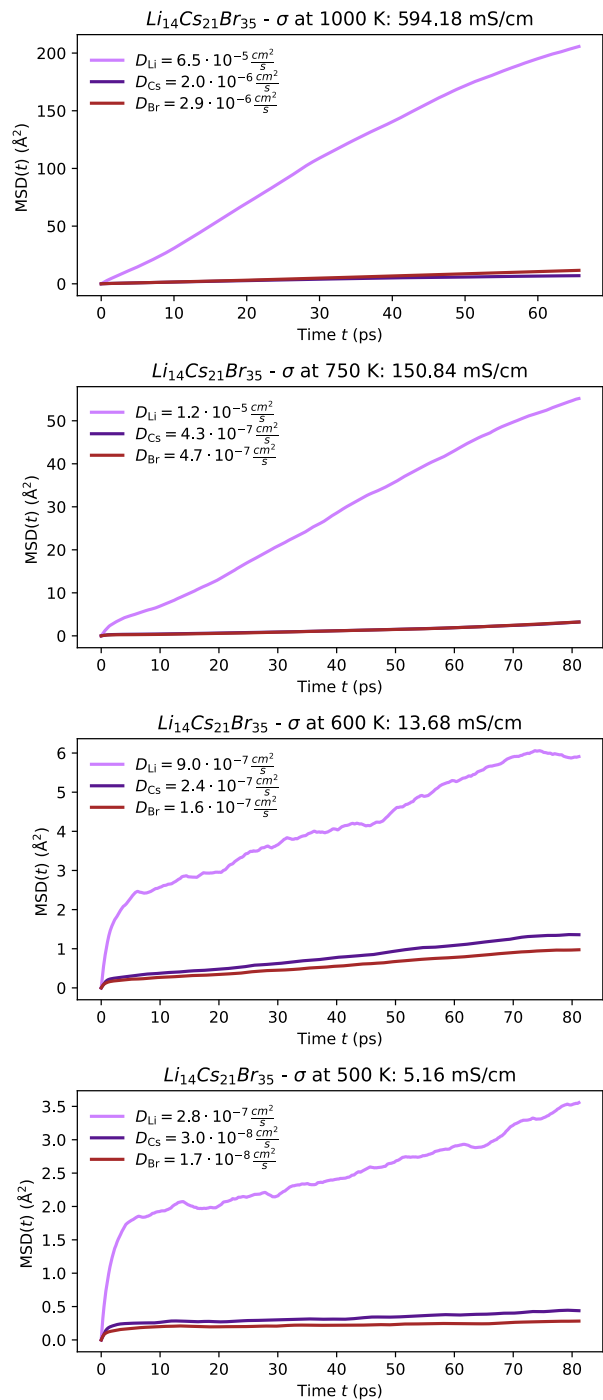

Fig. S21 MSD plot of Li along with host-lattice species of  $\text{Li}_2\text{Cs}_3\text{Br}_5$  at all temperatures studied with FPMD

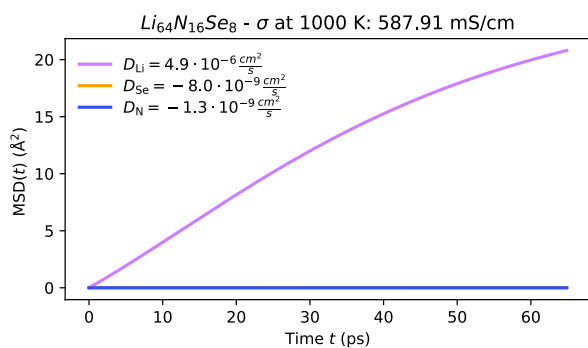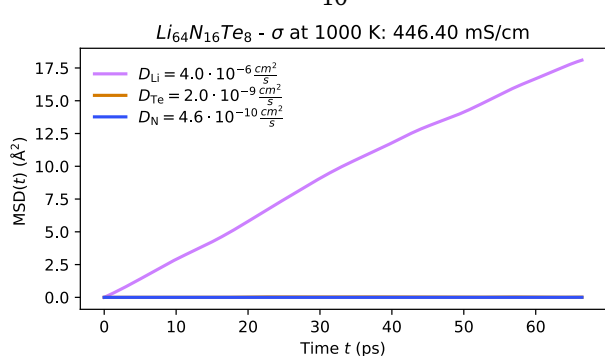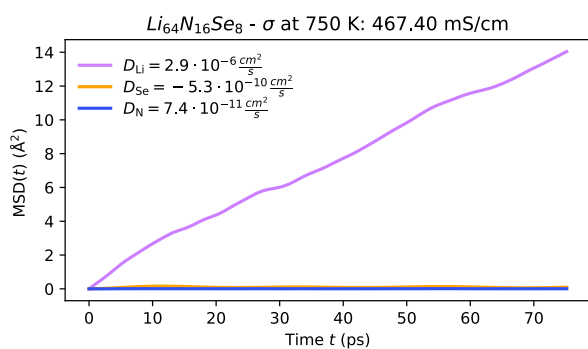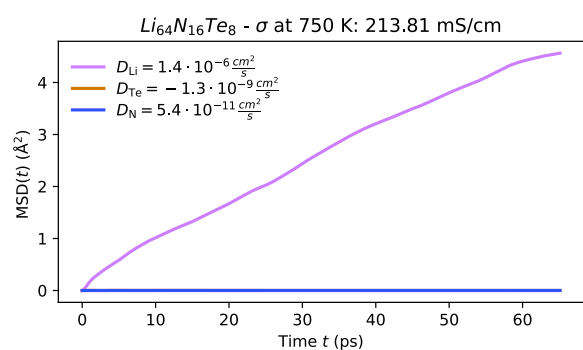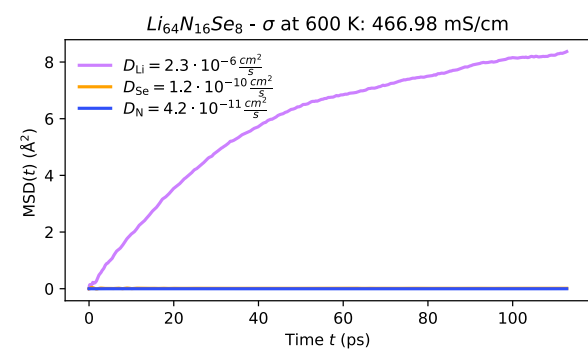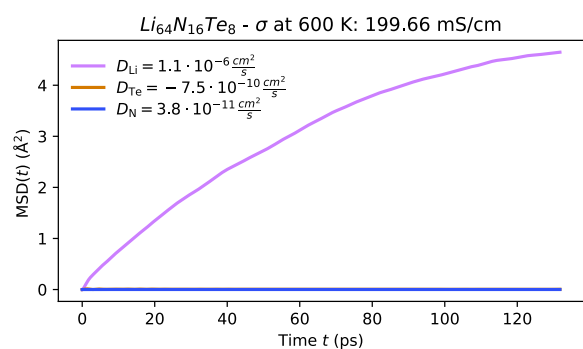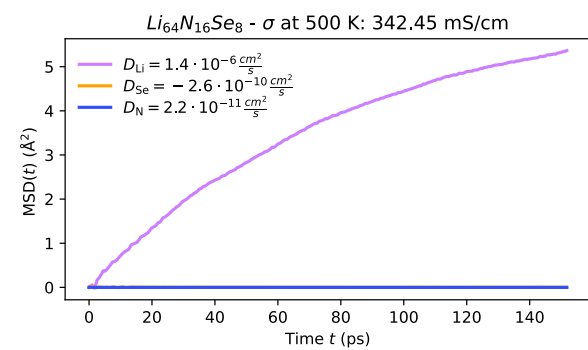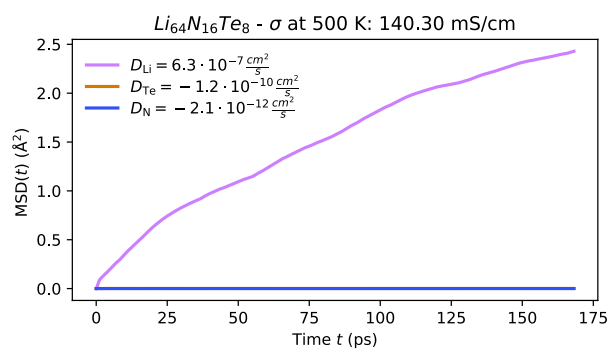

Fig. S22 MSD(t) plot of Li along with host-lattice species of *Li<sub>8</sub>SeN<sub>2</sub>* at all temperatures studied with FPMD.

Fig. S23 MSD(t) plot of Li along with host-lattice species of *Li<sub>8</sub>TeN<sub>2</sub>* at all temperatures studied with FPMD.

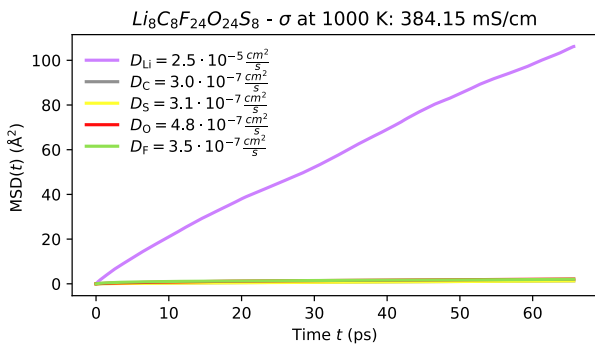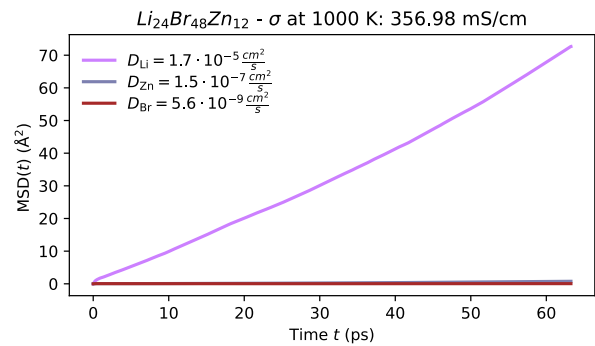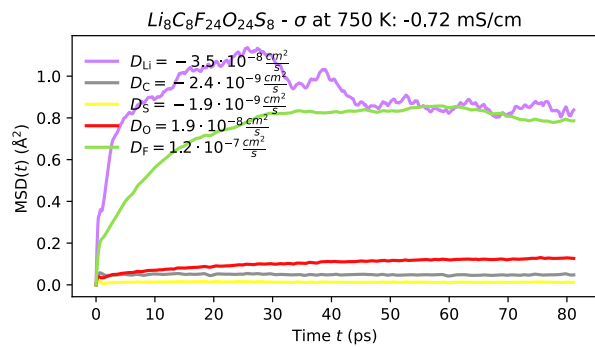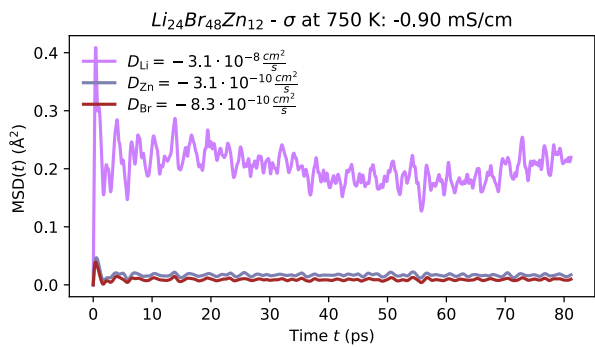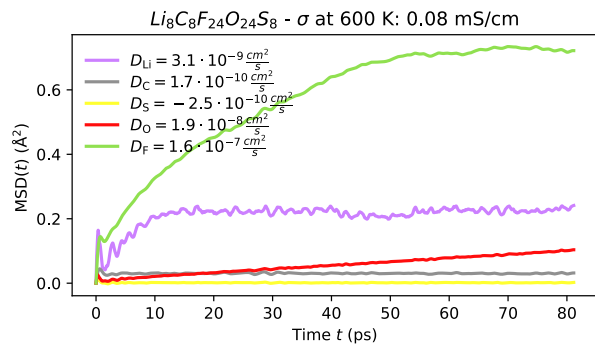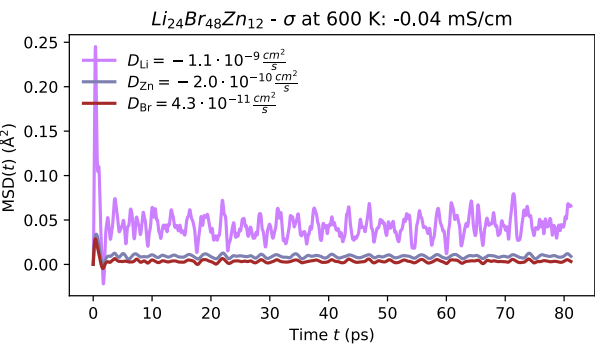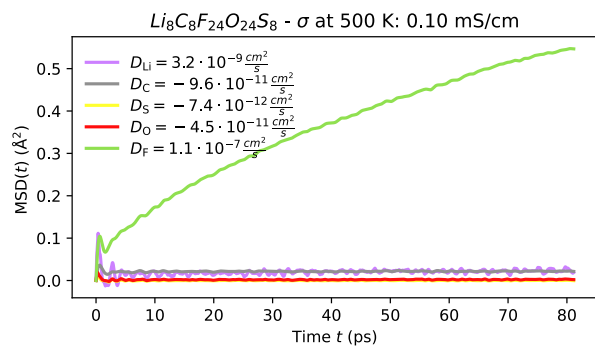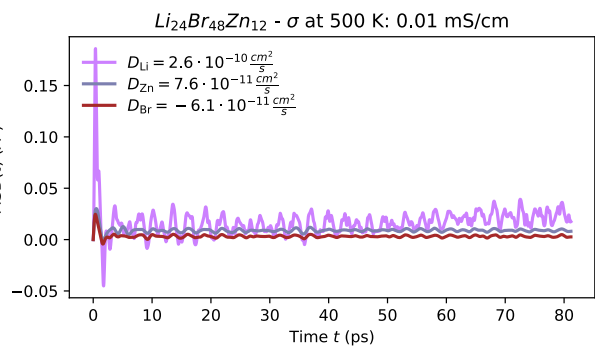

Fig. S24 MSD plot of Li along with host-lattice species of *LiCS(OF)<sub>3</sub>* at all temperatures studied with FPMD

Fig. S25 MSD plot of Li along with host-lattice species of *Li<sub>2</sub>ZnBr<sub>4</sub>* at all temperatures studied with FPMD

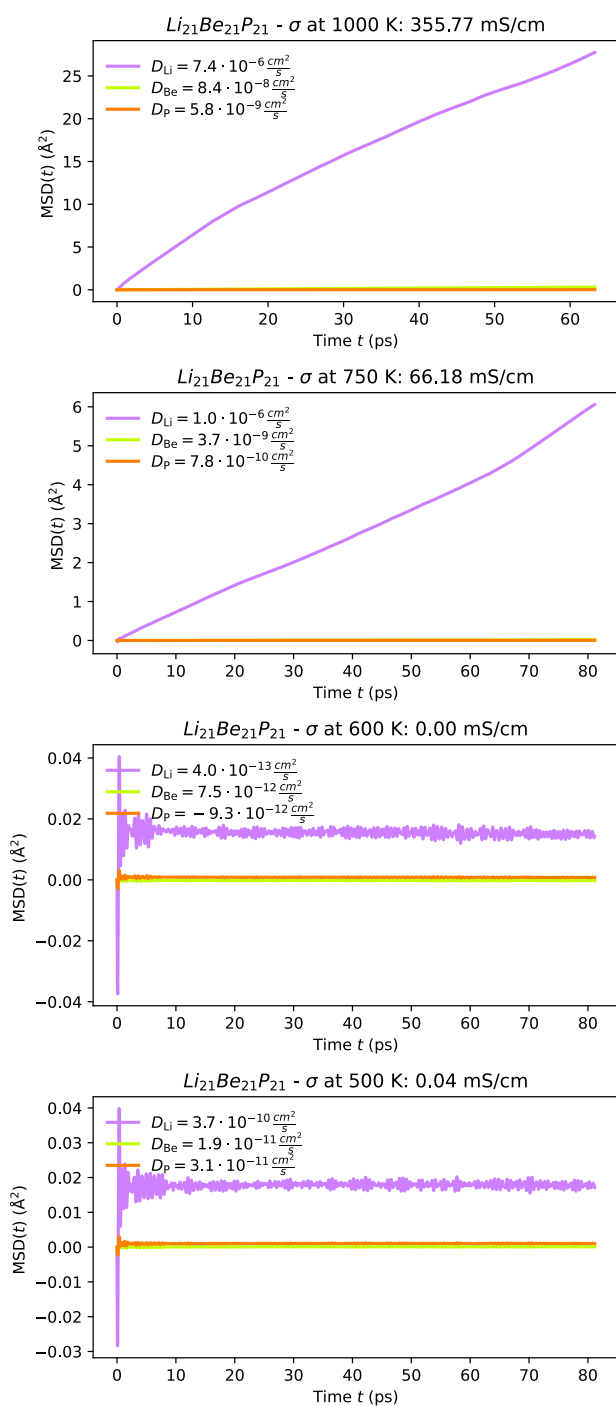

Fig. S26 MSD plot of Li along with host-lattice species of *LiBeP* at all temperatures studied with FPMD

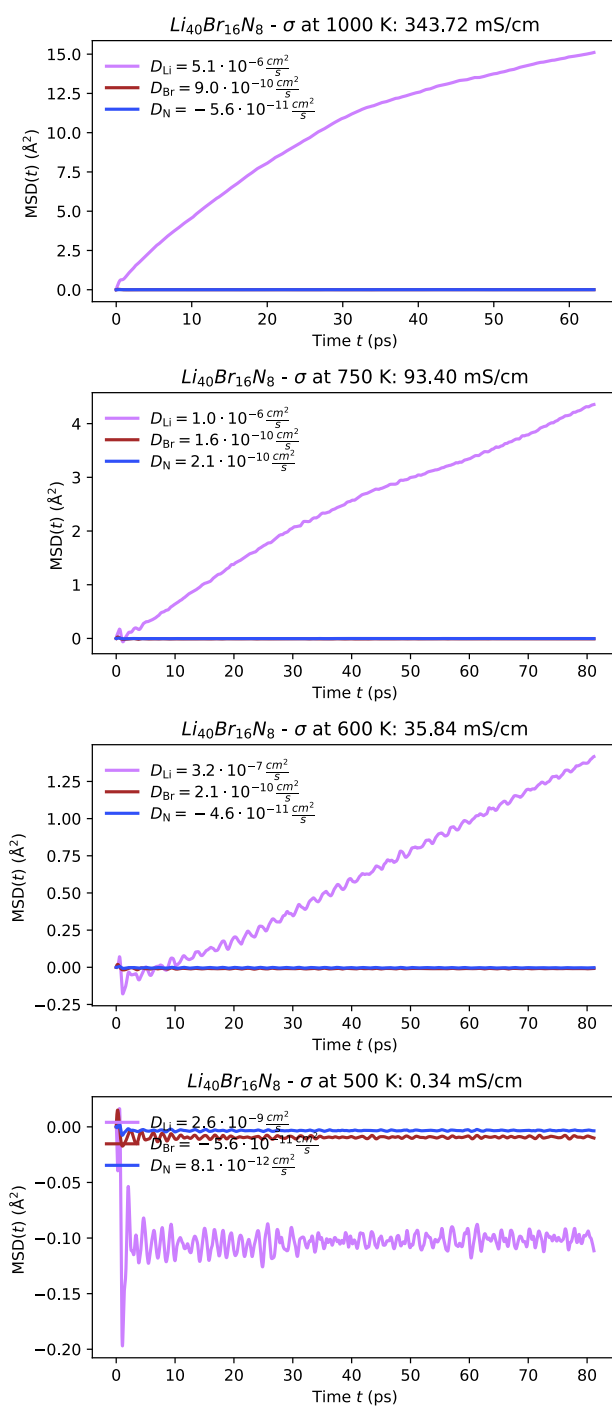

Fig. S27 MSD plot of Li along with host-lattice species of *Li<sub>5</sub>Br<sub>2</sub>N* at all temperatures studied with FPMD

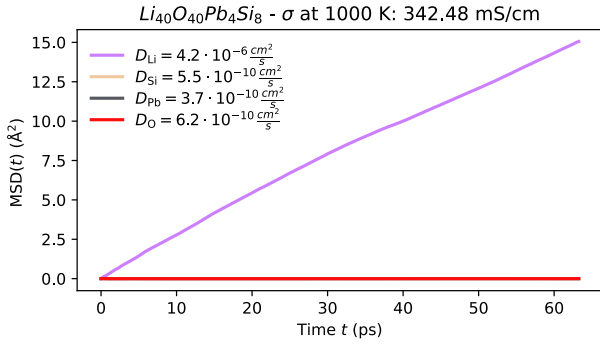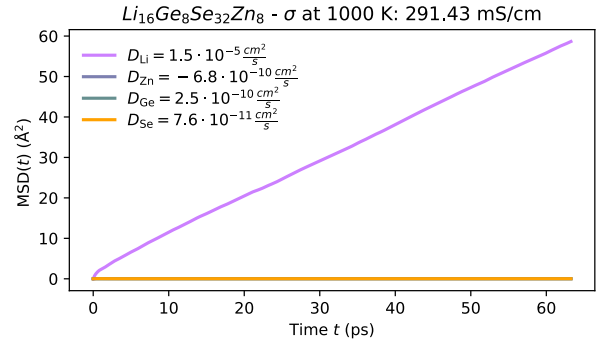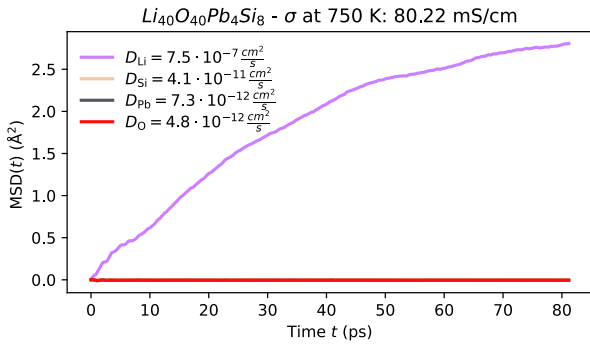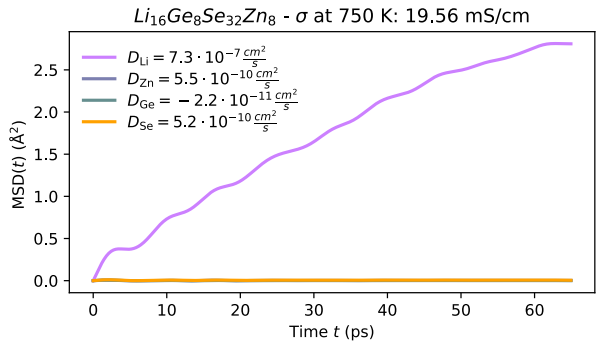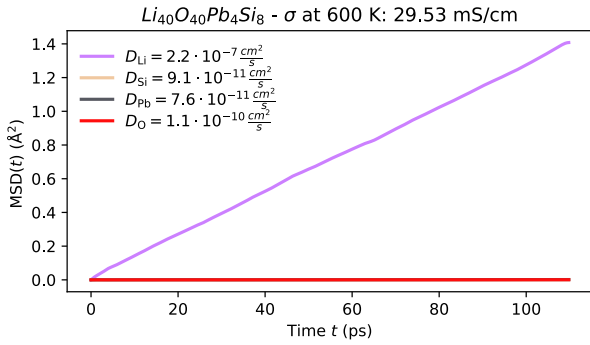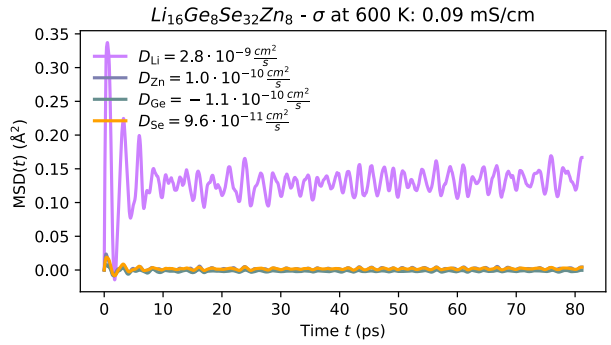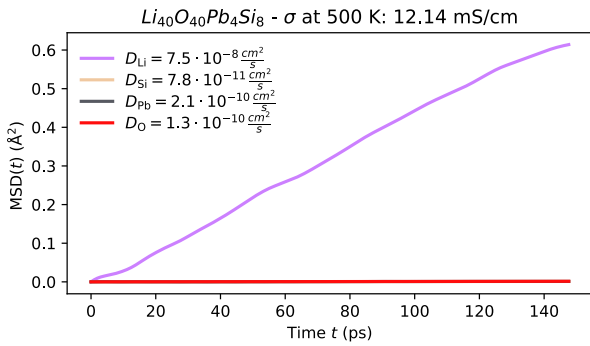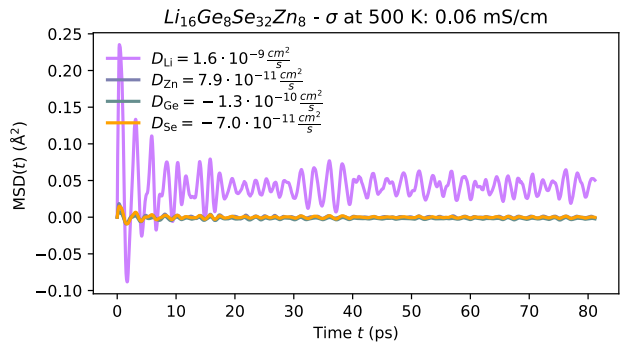

Fig. S28 MSD plot of Li along with host-lattice species of *Li<sub>10</sub>Si<sub>2</sub>PbO<sub>10</sub>* at all temperatures studied with FPMD

Fig. S29 MSD plot of Li along with host-lattice species of *Li<sub>2</sub>ZnGeSe<sub>4</sub>* at all temperatures studied with FPMD

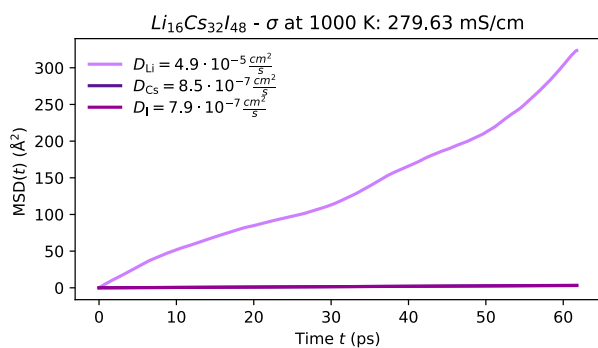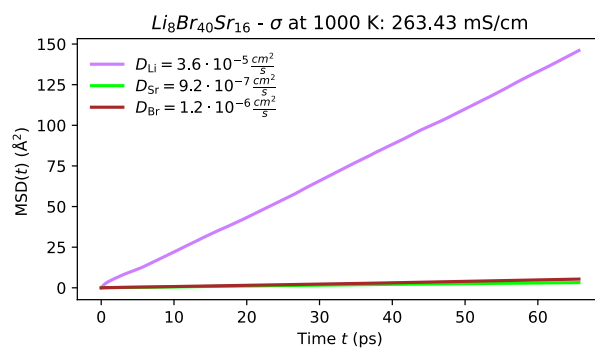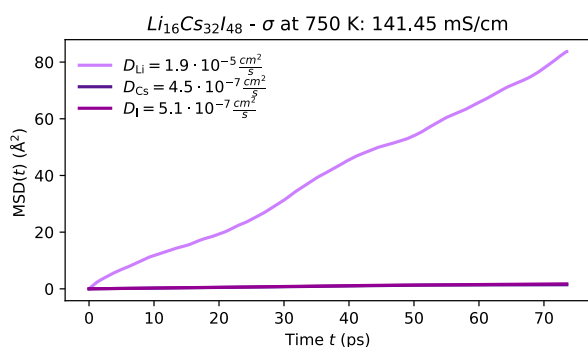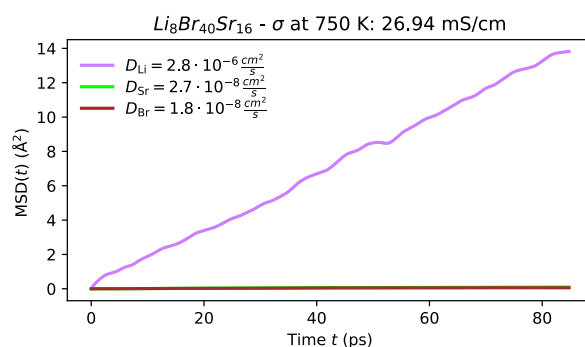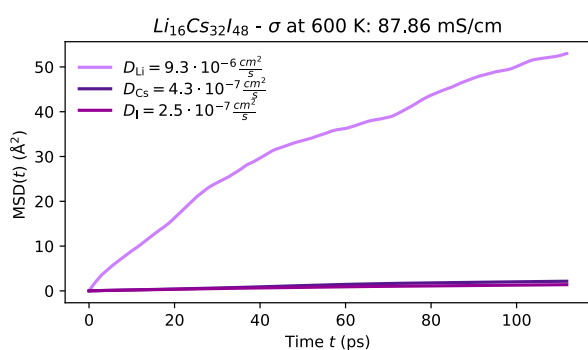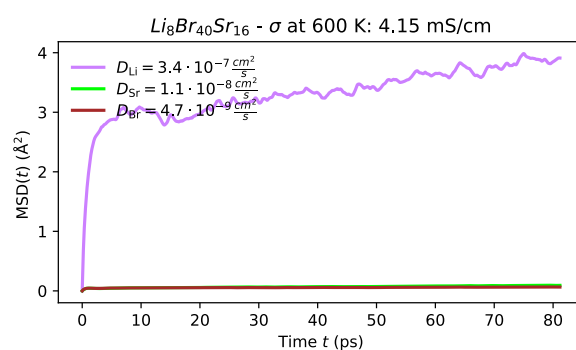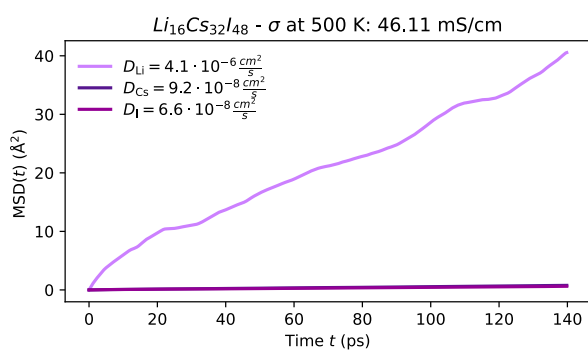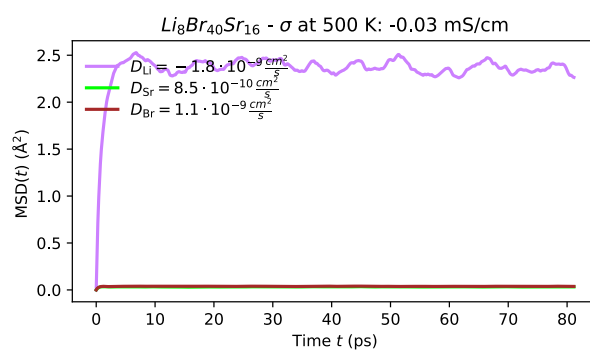

Fig. S30 MSD plot of Li along with host-lattice species of *LiCs<sub>2</sub>I<sub>3</sub>* at all temperatures studied with FPMD

Fig. S31 MSD plot of Li along with host-lattice species of *LiSr<sub>2</sub>Br<sub>5</sub>* at all temperatures studied with FPMD

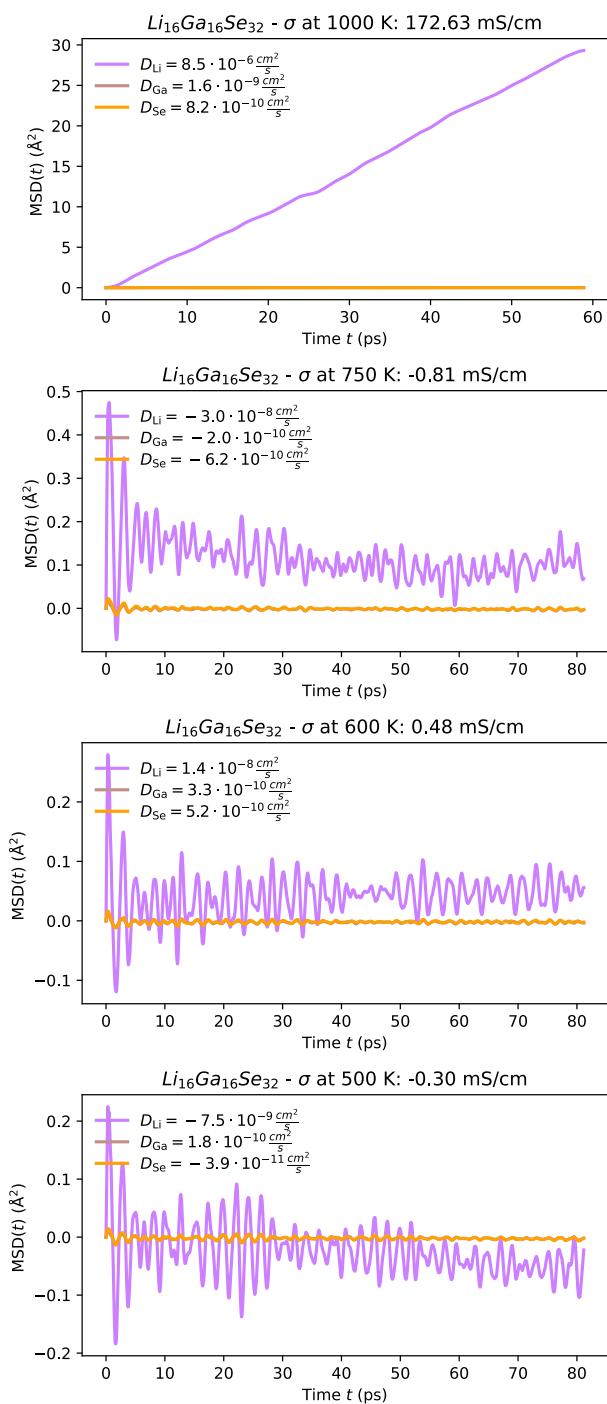

Fig. S32 MSD plot of Li along with host-lattice species of  $LiGaSe_2$  at all temperatures studied with FPMD

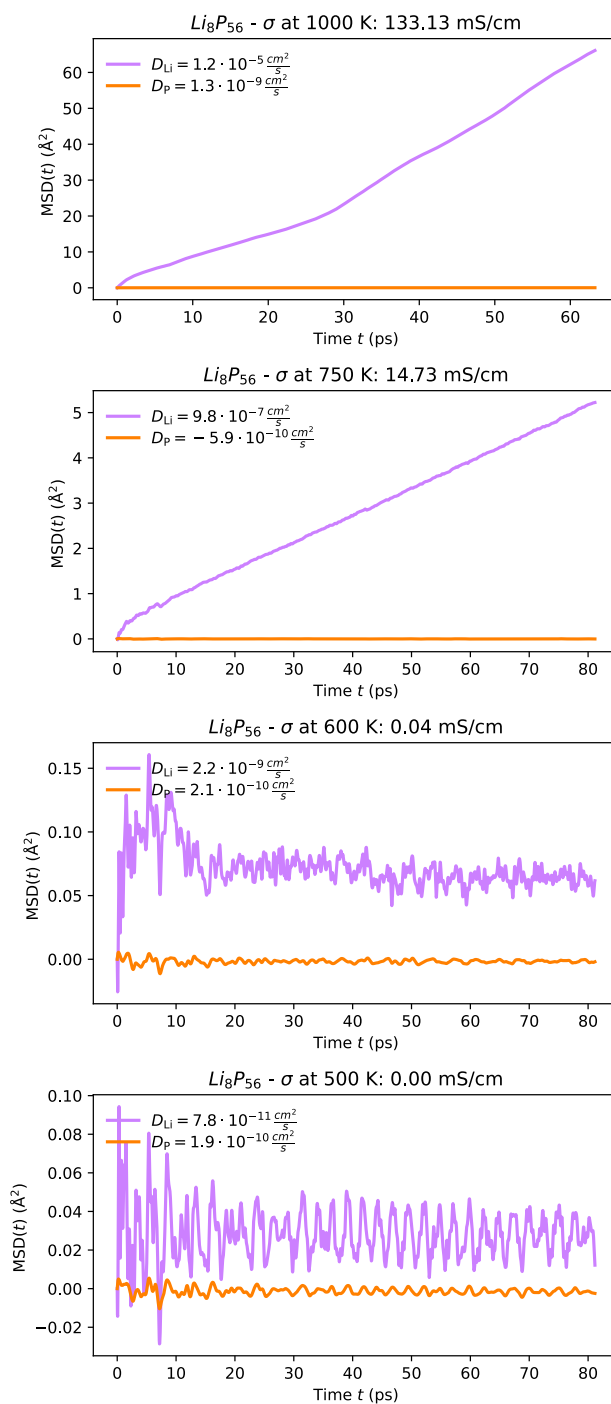

Fig. S33 MSD plot of Li along with host-lattice species of  $LiP_7$  at all temperatures studied with FPMD

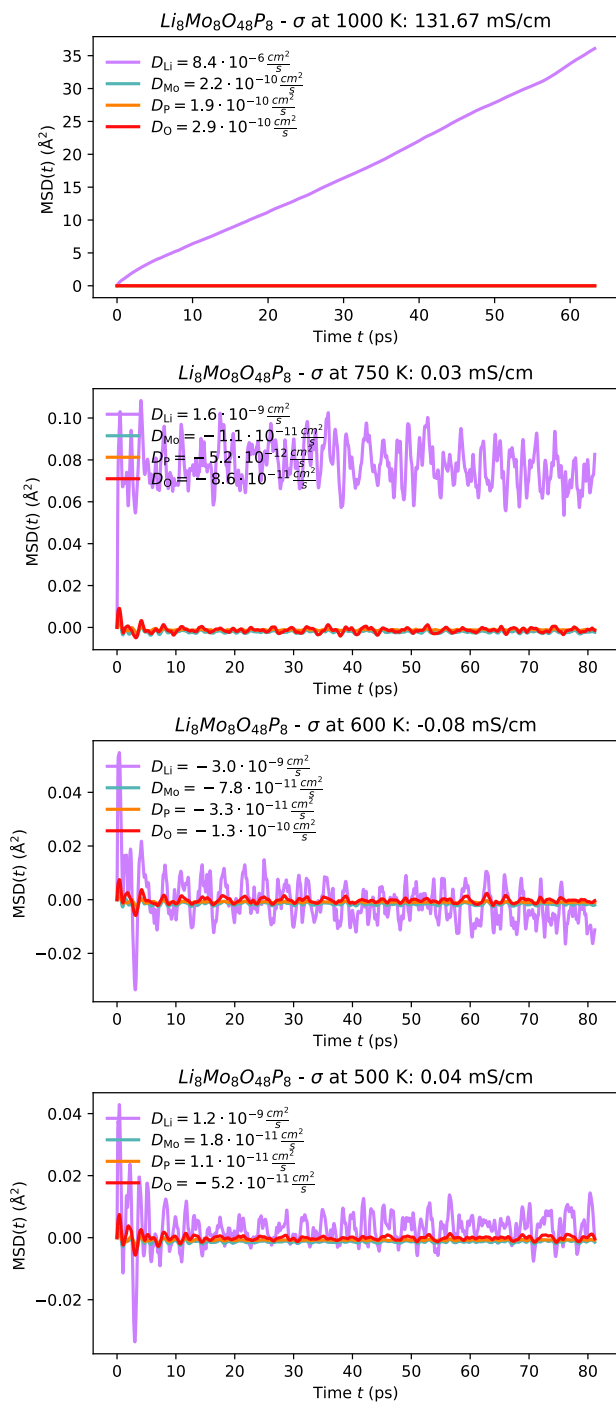

Fig. S34 MSD plot of Li along with host-lattice species of *LiMoPO<sub>6</sub>* at all temperatures studied with FPMD

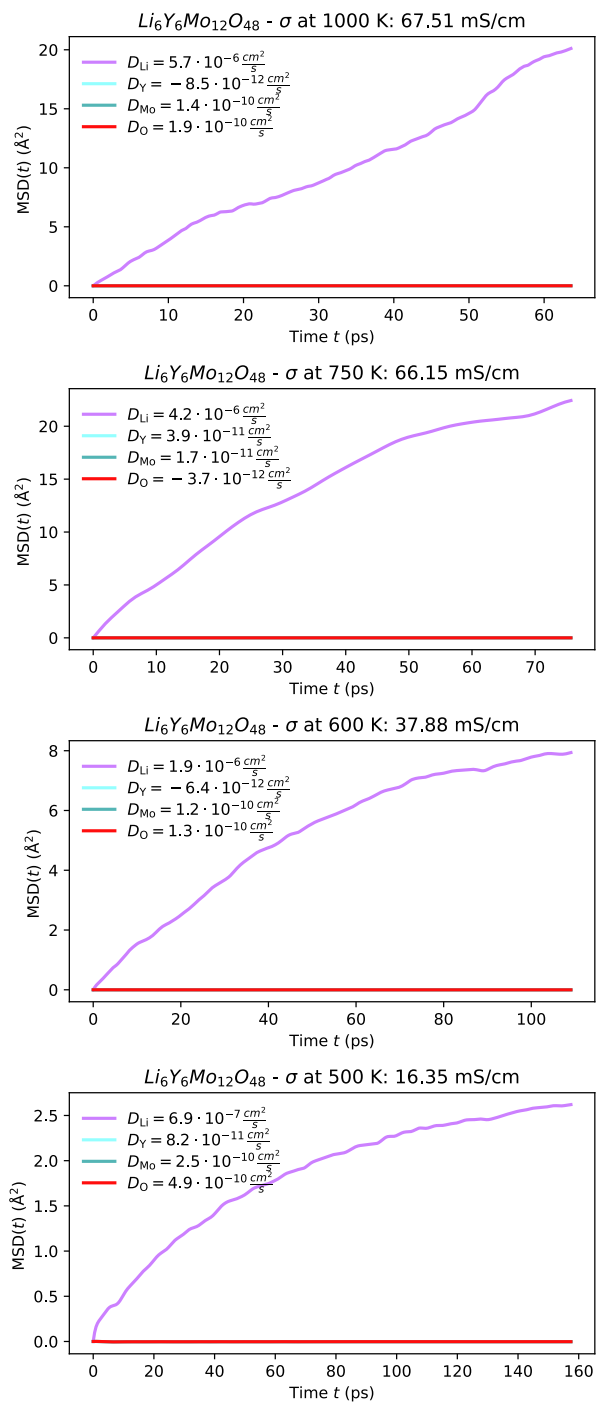

Fig. S35 MSD(t) plot of Li along with host-lattice species of *LiY(MoO<sub>4</sub>)<sub>2</sub>* at all temperatures studied with FPMD.

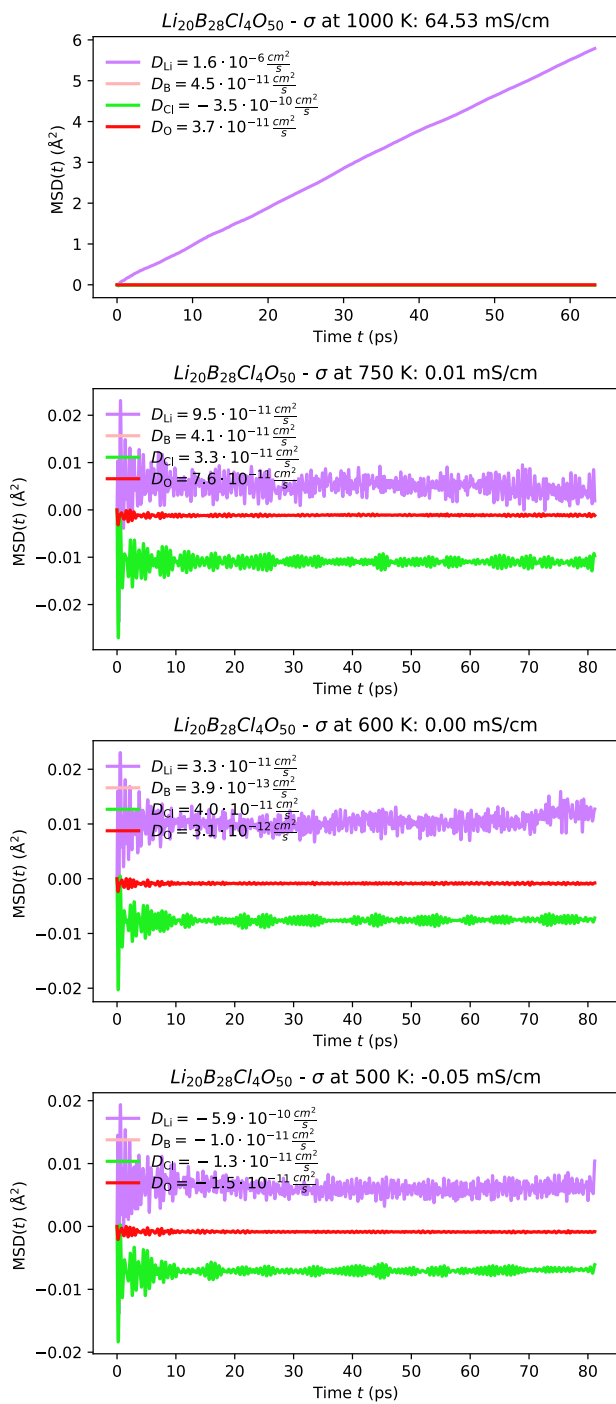

Fig. S36 MSD plot of Li along with host-lattice species of *Li<sub>10</sub>B<sub>14</sub>Cl<sub>2</sub>O<sub>25</sub>* at all temperatures studied with FPMD

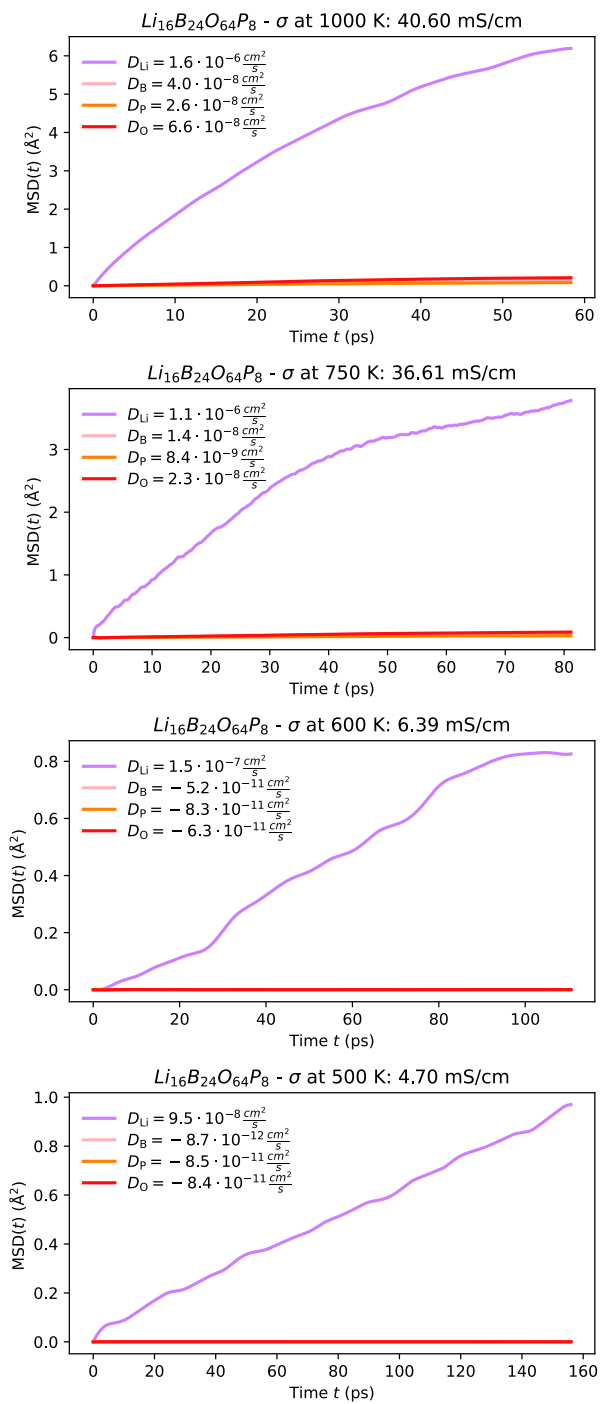

Fig. S37 MSD plot of Li along with host-lattice species of *Li<sub>2</sub>B<sub>3</sub>PO<sub>8</sub>* at all temperatures studied with FPMD

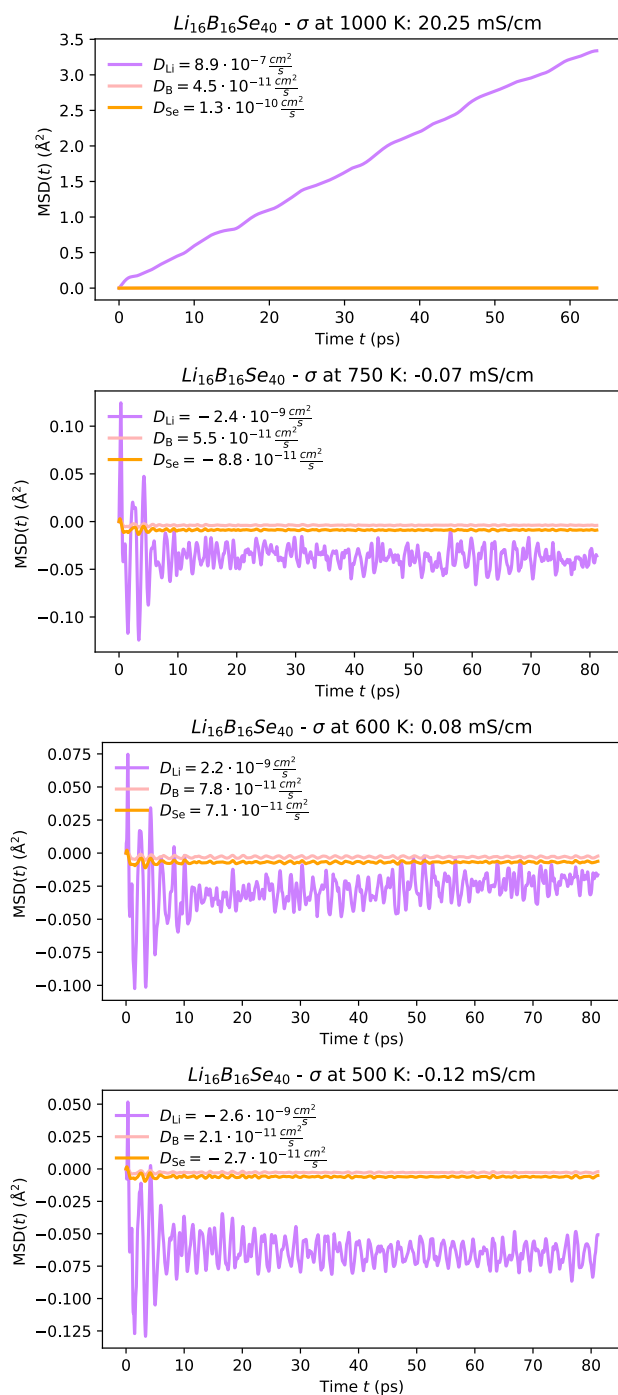

Fig. S38 MSD plot of Li along with host-lattice species of  $\text{Li}_2\text{B}_2\text{Se}_5$  at all temperatures studied with FPMD

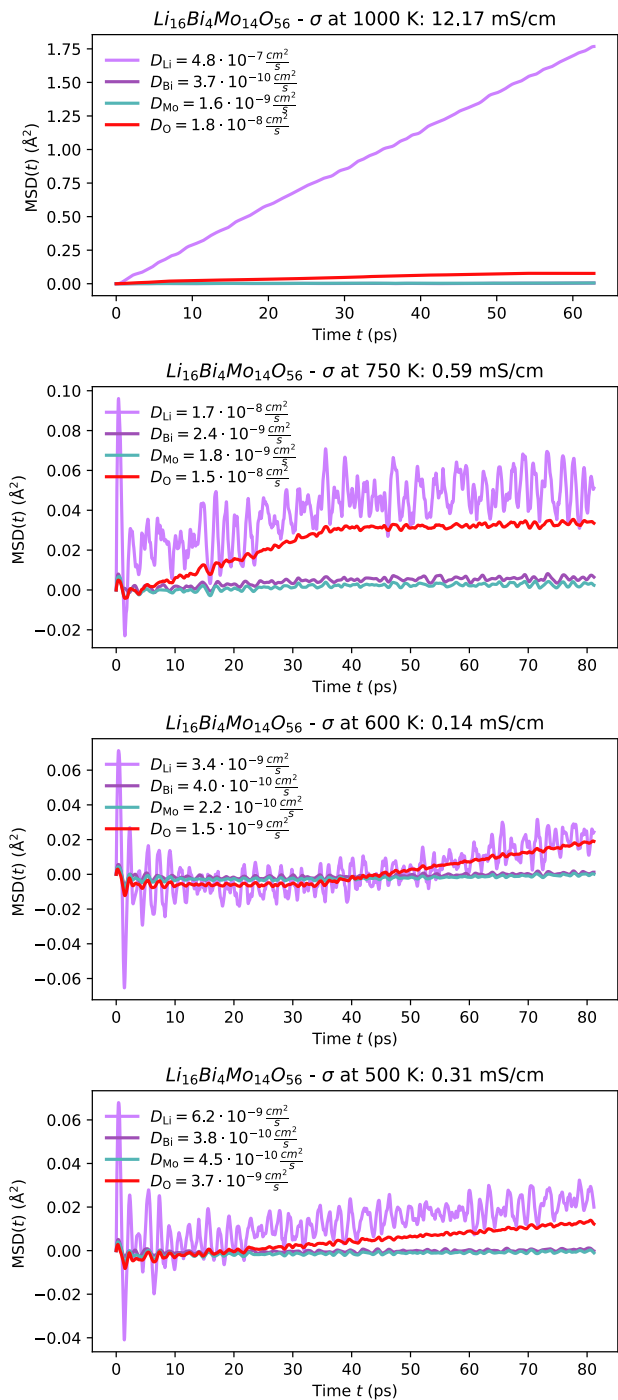

Fig. S39 MSD plot of Li along with host-lattice species of  $\text{Li}_8\text{Bi}_2(\text{MoO}_4)_7$  at all temperatures studied with FPMD

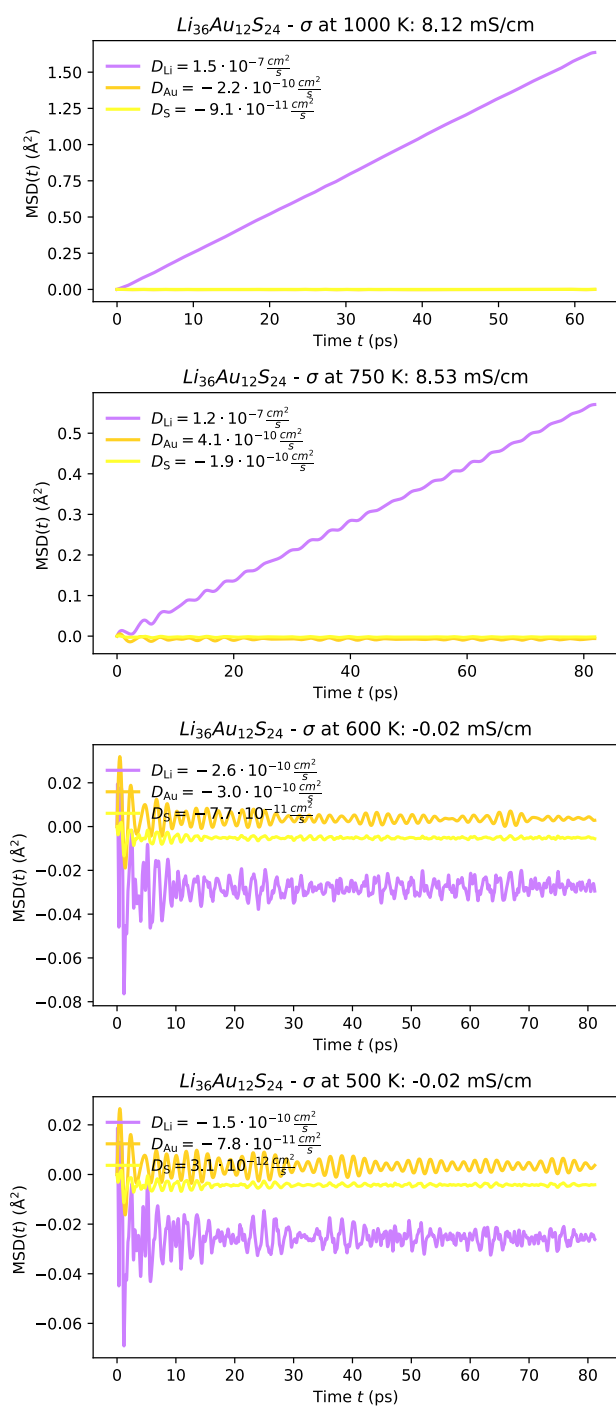

Fig. S40 MSD plot of Li along with host-lattice species of  $Li_3AuS_2$  at all temperatures studied with FPMD

### S3 Non diffusive structures

We find 18 materials that do not exhibit Li-ion diffusion in our FPMD simulations at 1000 K. We show the MSD plots only at 1000 K as we did not run FPMD at other temperatures on account of not being able to resolve diffusion at 1000 K.

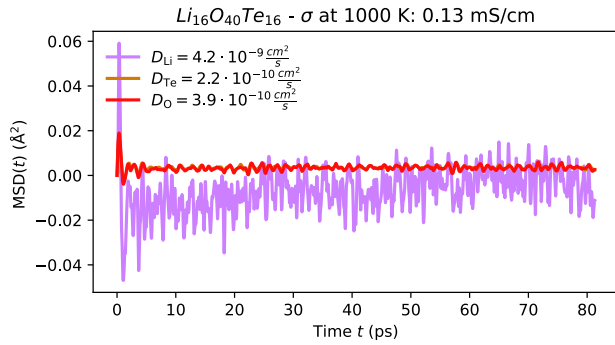

Fig. S41 MSD plot of Li along with host-lattice species of  $Li_2Te_2O_5$  at 1000 K studied with FPMD

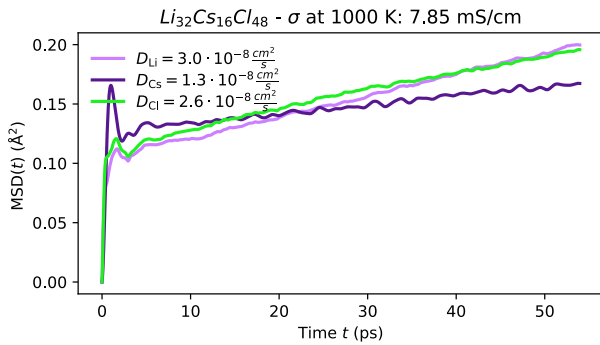

Fig. S42 MSD plot of Li along with host-lattice species of  $Li_2CsCl_3$  at 1000 K studied with FPMD

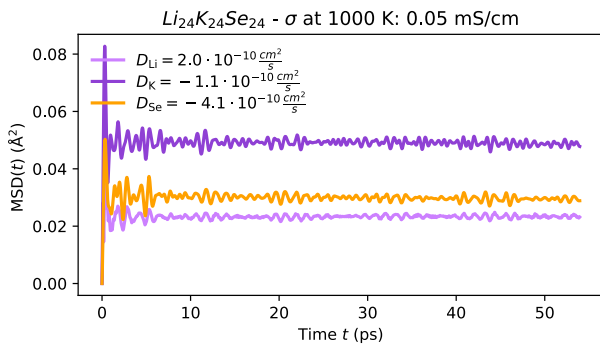

Fig. S43 MSD plot of Li along with host-lattice species of  $LiKSe$  at 1000 K studied with FPMD

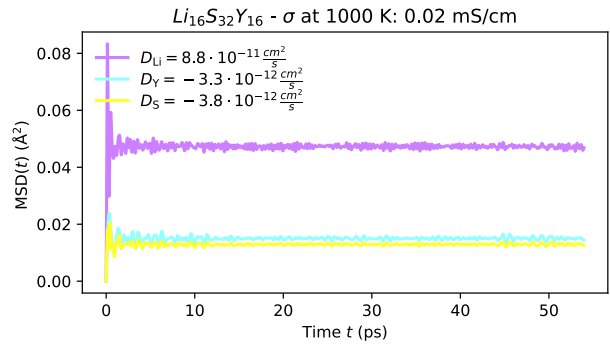

Fig. S44 MSD plot of Li along with host-lattice species of  $LiYS_2$  at 1000 K studied with FPMD

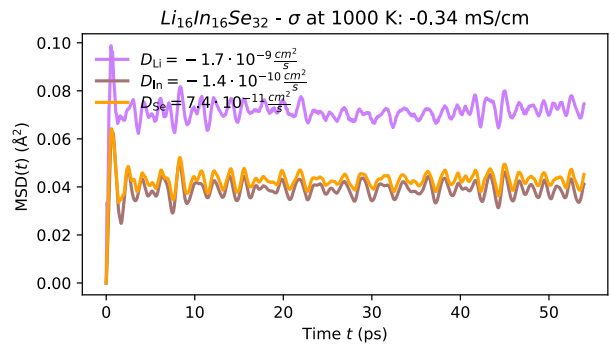

Fig. S45 MSD plot of Li along with host-lattice species of  $LiInSe_2$  at 1000 K studied with FPMD

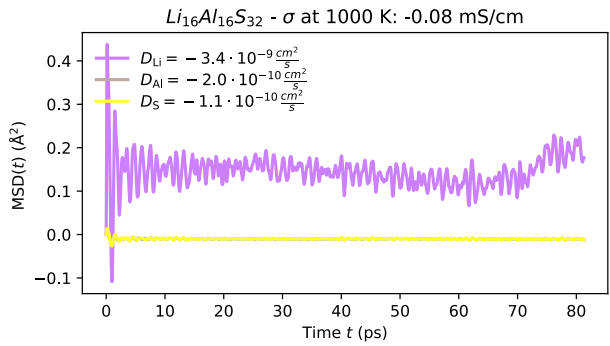

Fig. S46 MSD plot of Li along with host-lattice species of  $LiAlS_2$  at 1000 K studied with FPMD

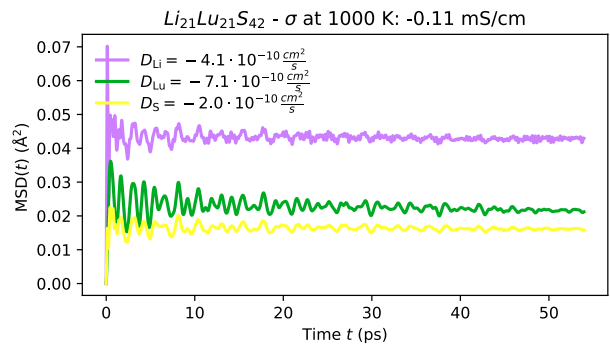

Fig. S47 MSD plot of Li along with host-lattice species of  $LiLuS_2$  at 1000 K studied with FPMD

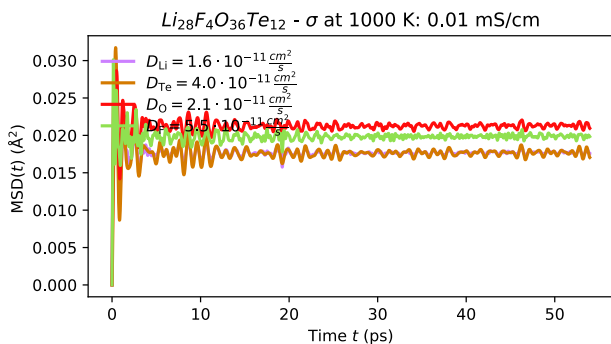

Fig. S48 MSD plot of Li along with host-lattice species of  $Li_7Te_3O_9F$  at 1000 K studied with FPMD

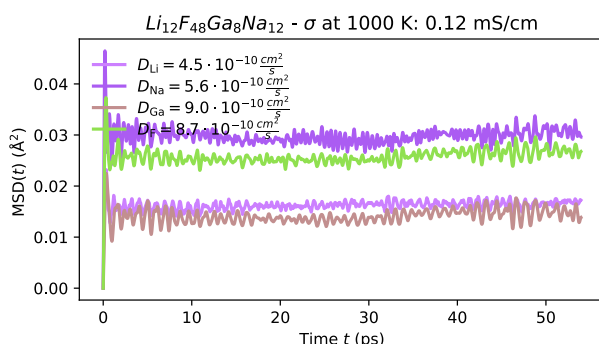

Fig. S52 MSD plot of Li along with host-lattice species of  $Li_3Na_3Ga_2F_{12}$  at 1000 K studied with FPMD

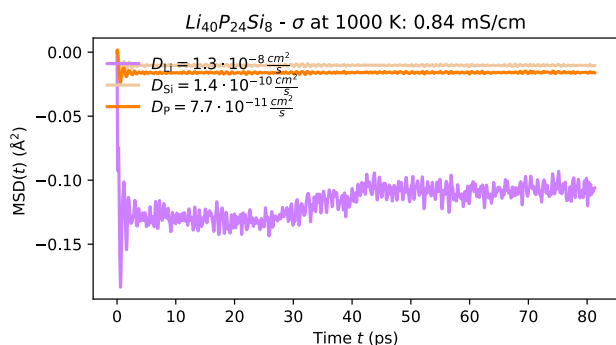

Fig. S49 MSD plot of Li along with host-lattice species of  $Li_5SiP_3$  at 1000 K studied with FPMD

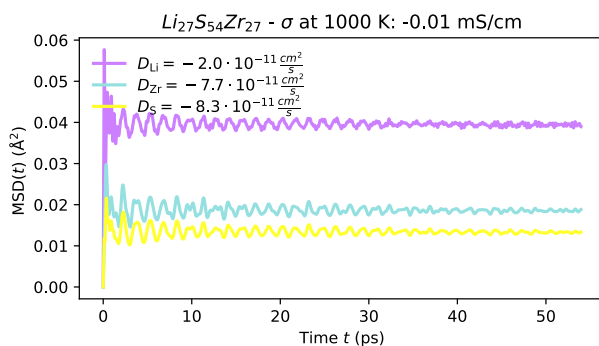

Fig. S53 MSD plot of Li along with host-lattice species of  $LiZrS_2$  at 1000 K studied with FPMD

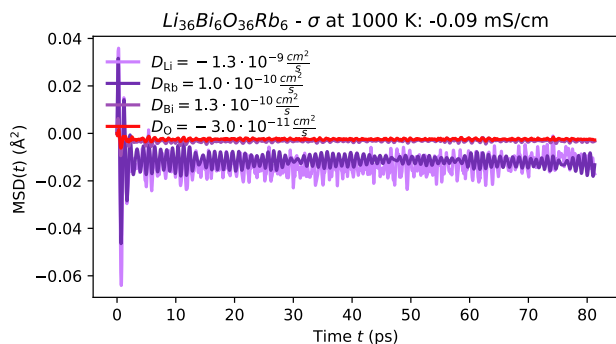

Fig. S50 MSD plot of Li along with host-lattice species of  $Li_6RbBiO_6$  at 1000 K studied with FPMD

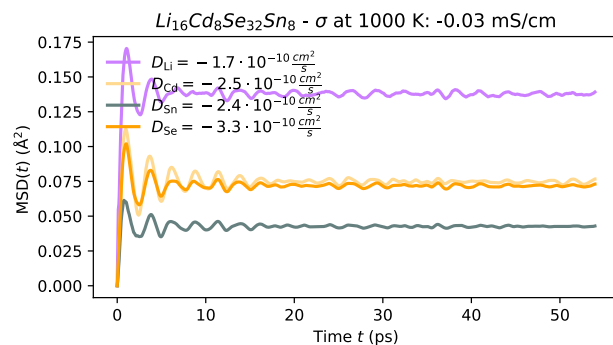

Fig. S54 MSD plot of Li along with host-lattice species of  $Li_2CdSnSe_4$  at 1000 K studied with FPMD

Fig. 5

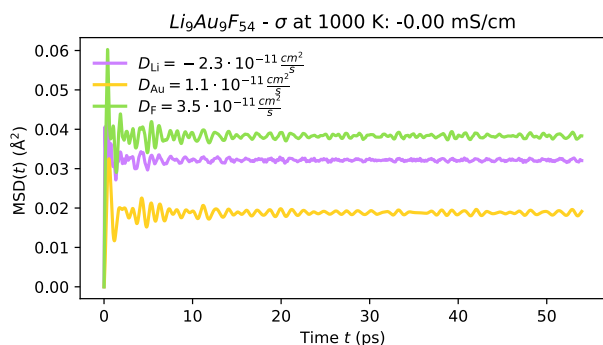

Fig. S51 MSD plot of Li along with host-lattice species of  $LiAuF_6$  at 1000 K studied with FPMD

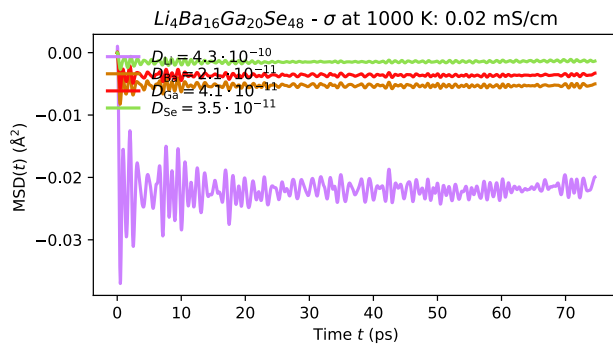

Fig. S55 MSD plot of Li along with host-lattice species of  $LiBa_4Ga_5Se_{12}$  at 1000 K studied with FPMD

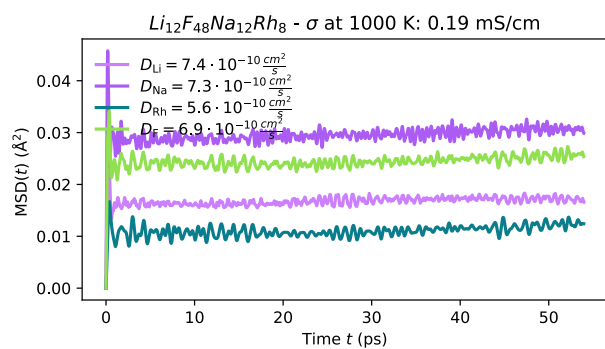

Fig. S56 MSD plot of Li along with host-lattice species of *Li<sub>3</sub>Na<sub>3</sub>Rh<sub>2</sub>F<sub>12</sub>* at 1000 K studied with FPMD

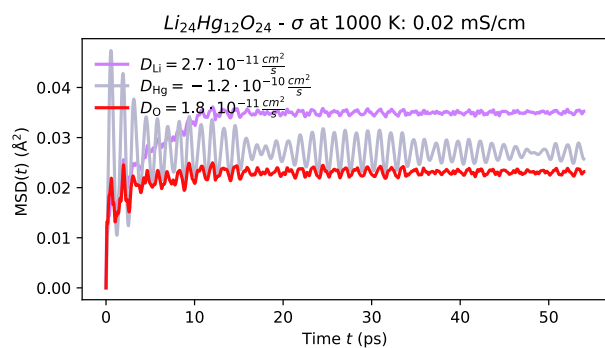

Fig. S57 MSD plot of Li along with host-lattice species of *Li<sub>2</sub>HgO<sub>2</sub>* at 1000 K studied with FPMD

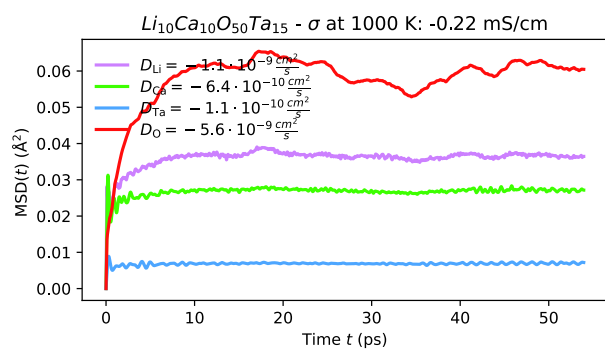

Fig. S58 MSD plot of Li along with host-lattice species of *Li<sub>2</sub>Ca<sub>2</sub>Ta<sub>3</sub>O<sub>10</sub>* at 1000 K studied with FPMD
